# Supplementary material
Source: PubMed Central journal article supplement (PMC4085636)
Supplement: mmc1.pdf [file mmc1.pdf]

The American Journal of Human Genetics, Volume 95

Supplemental Data

## **Gene-Age Interactions in Blood Pressure Regulation:**

### **A Large-Scale Investigation**

#### **with the CHARGE, Global BPgen, and ICBP Consortia**

Jeannette Simino, Gang Shi, Joshua C. Bis, Daniel I. Chasman, Georg B. Ehret, Xiangjun Gu, Xiuqing Guo, Shih-Jen Hwang, Eric Sijbrands, Albert V. Smith, Germaine Verwoert, Jennifer L. Bragg-Gresham, Gemma Cadby, Peng Chen, Ching-Yu Cheng, Tanguy Corre, Rudolf A. de Boer, Anuj Goel, Toby Johnson, Chiea Chuen Khor, LifeLines Cohort Study, Carla Lluís-Ganella, Jian'an Luan, Leo-Pekka Lyytikäinen, Ilja M. Nolte, Xueling Sim, Siim Sõber, Peter J. van der Most, Niek Verweij, Jing Hua Zhao, Najaf Amin, Eric Boerwinkle, Claude Bouchard, Abbas Dehghan, Gudny Eiriksdottir, Roberto Elosua, Oscar H. Franco, Christian Gieger, Tamara B. Harris, Serge Hercberg, Albert Hofman, Alan L. James, Andrew D. Johnson, Mika Kähönen, Kay-Tee Khaw, Zoltan Kutalik, Martin G. Larson, Lenore J. Launer, Guo Li, Jianjun Liu, Kiang Liu, Alanna C. Morrison, Gerjan Navis, Rick Twee-Hee Ong, George J. Papanicolaou, Brenda W. Penninx, Bruce M. Psaty, Leslie J. Raffel, Olli T. Raitakari, Kenneth Rice, Fernando Rivadeneira, Lynda M. Rose, Serena Sanna, Robert A. Scott, David S. Siscovick, Ronald P. Stolk, Andre G. Uitterlinden, Dhananjay Vaidya, Melanie M. van der Klauw, Ramachandran S. Vasan, Eranga Nishanthie Vithana, Uwe Völker, Henry Völzke, Hugh Watkins, Terri Young, Tin Aung, Murielle Bochud, Martin Farrall, Catharina A. Hartman, Maris Laan, Edward Lakatta, Terho Lehtimäki, Ruth J.F. Loos, Gavin Lucas, Pierre Meneton, Lyle J. Palmer, Rainer Rettig, Harold Snieder, E. Shyong Tai, Yik Ying Teo, Pim van der Harst, Nicholas J. Wareham, Cisca Wijmenga, Tien Yin Wong, Myriam Fornage, Vilmundur Gudnason, Daniel Levy, Walter Palmas, Paul M. Ridker, Jerome I. Rotter, Cornelia van Duijn, Jacqueline C.M. Witteman, Aravinda Chakravarti, and Dabeeru C. Rao

## **Table of Contents for the Supplemental Material**

**Figure S1:** QQ Plots and Genomic Inflation Factors ( $\lambda$ ) for all SNP Main Effect and SNP-age Interaction Meta-analyses

**Figure S2:** Regional Associations Plots for Suggestive and Significant Loci Identified by the Meta-Regression of Stage 1 Studies

### Stage 1 (CHARGE) Studies

- Study Descriptions
- Descriptive Statistics (**Table S1**)
- Genotyping, Imputation, and Association Analysis Information (**Table S2**)
- Genomic Inflation Factors (**Table S3**)

### Stage 2 (largely Global BPgen and ICBP) Studies

- Study Descriptions
- Descriptive Statistics (**Table S4**)
- Genotyping, Imputation, and Association Analysis Information (**Table S5**)

### Singapore Replication Studies

- Study Descriptions
- Descriptive Statistics (**Table S6**)
- Genotyping, Imputation, and Association Analysis Information (**Table S7**)

Titles of Supplemental Tables 8-22 (**Tables S8-S22** are available the Excel Workbook "Simino\_Supplementary\_Tables\_8\_to\_22.xlsx")

Acknowledgments

LifeLines Banner Authorship

References

**Main Effects Test****2 Degrees of Freedom Test****Interaction Test****SBP**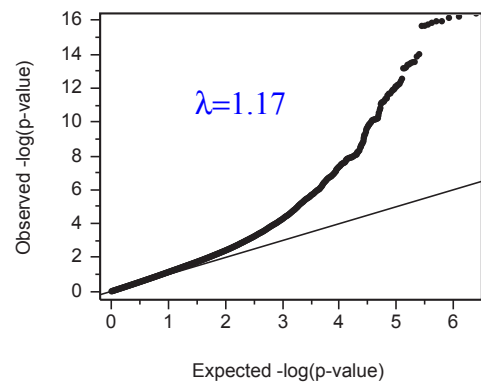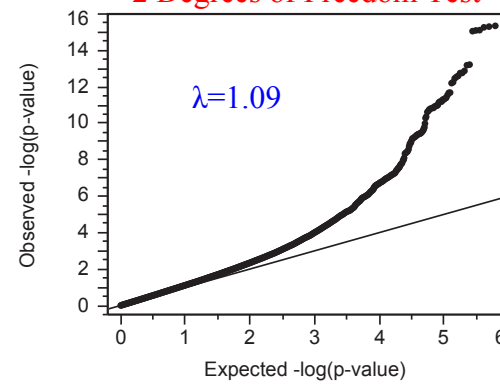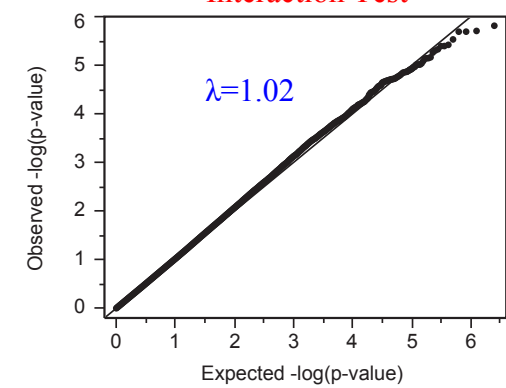**DBP**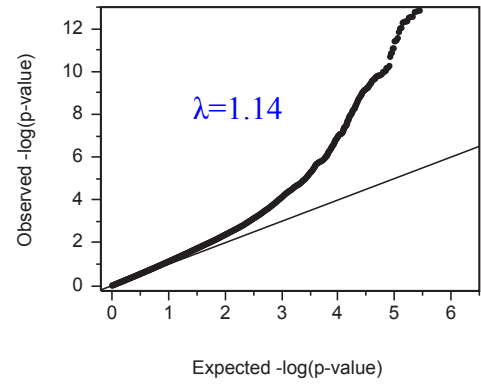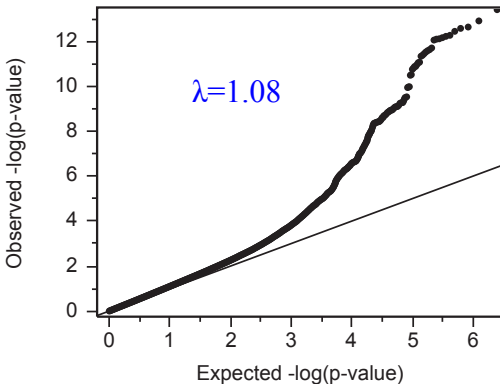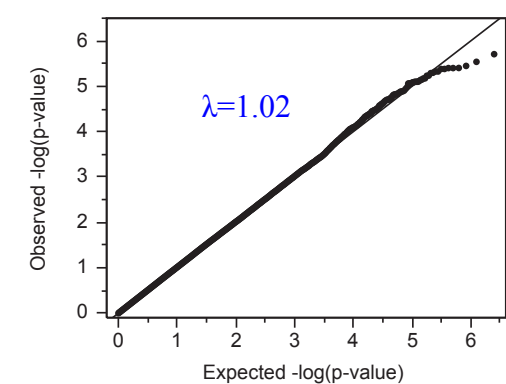**MAP**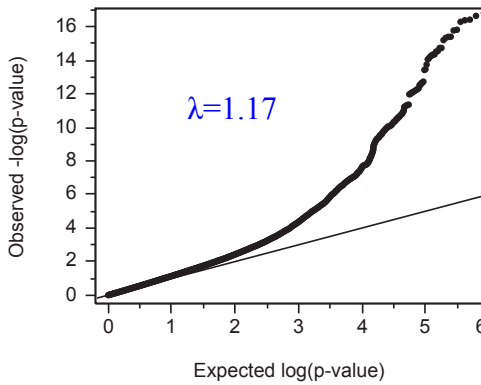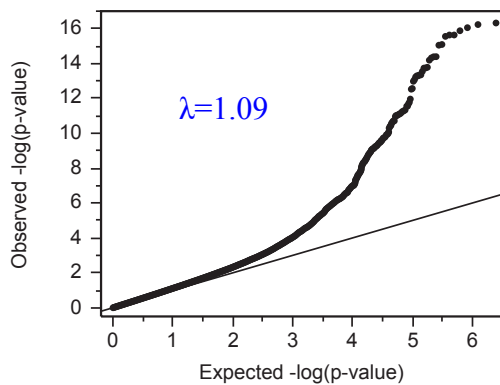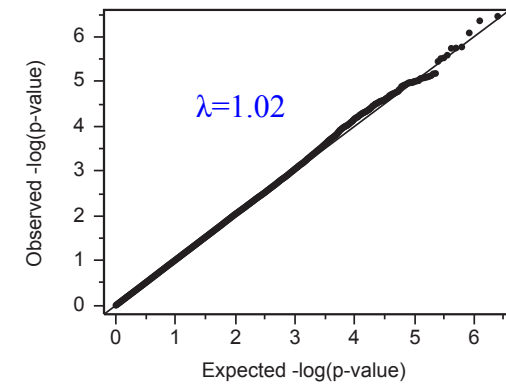**PP**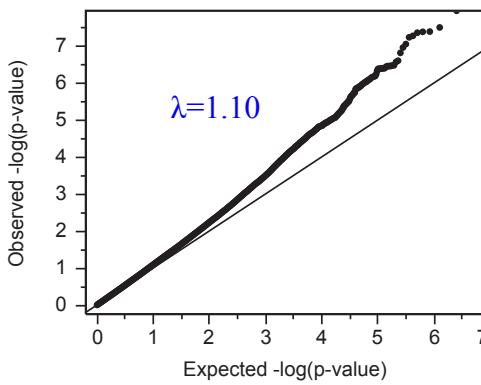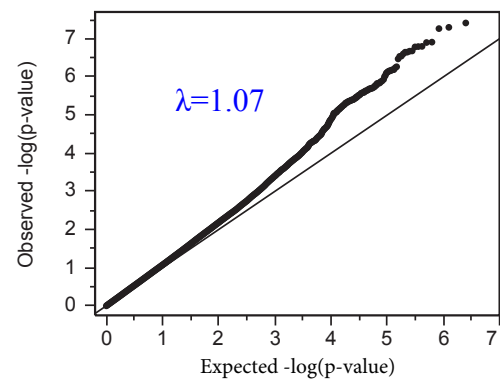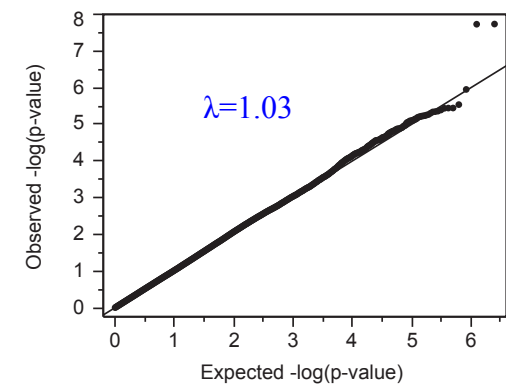**Figure S1: Pre-Genomic Control Adjustment:QQ Plots of Association and Genomic Inflation Factors ( $\lambda$ )**

Figure S2: Regional Plots for the Joint 2 DF Test

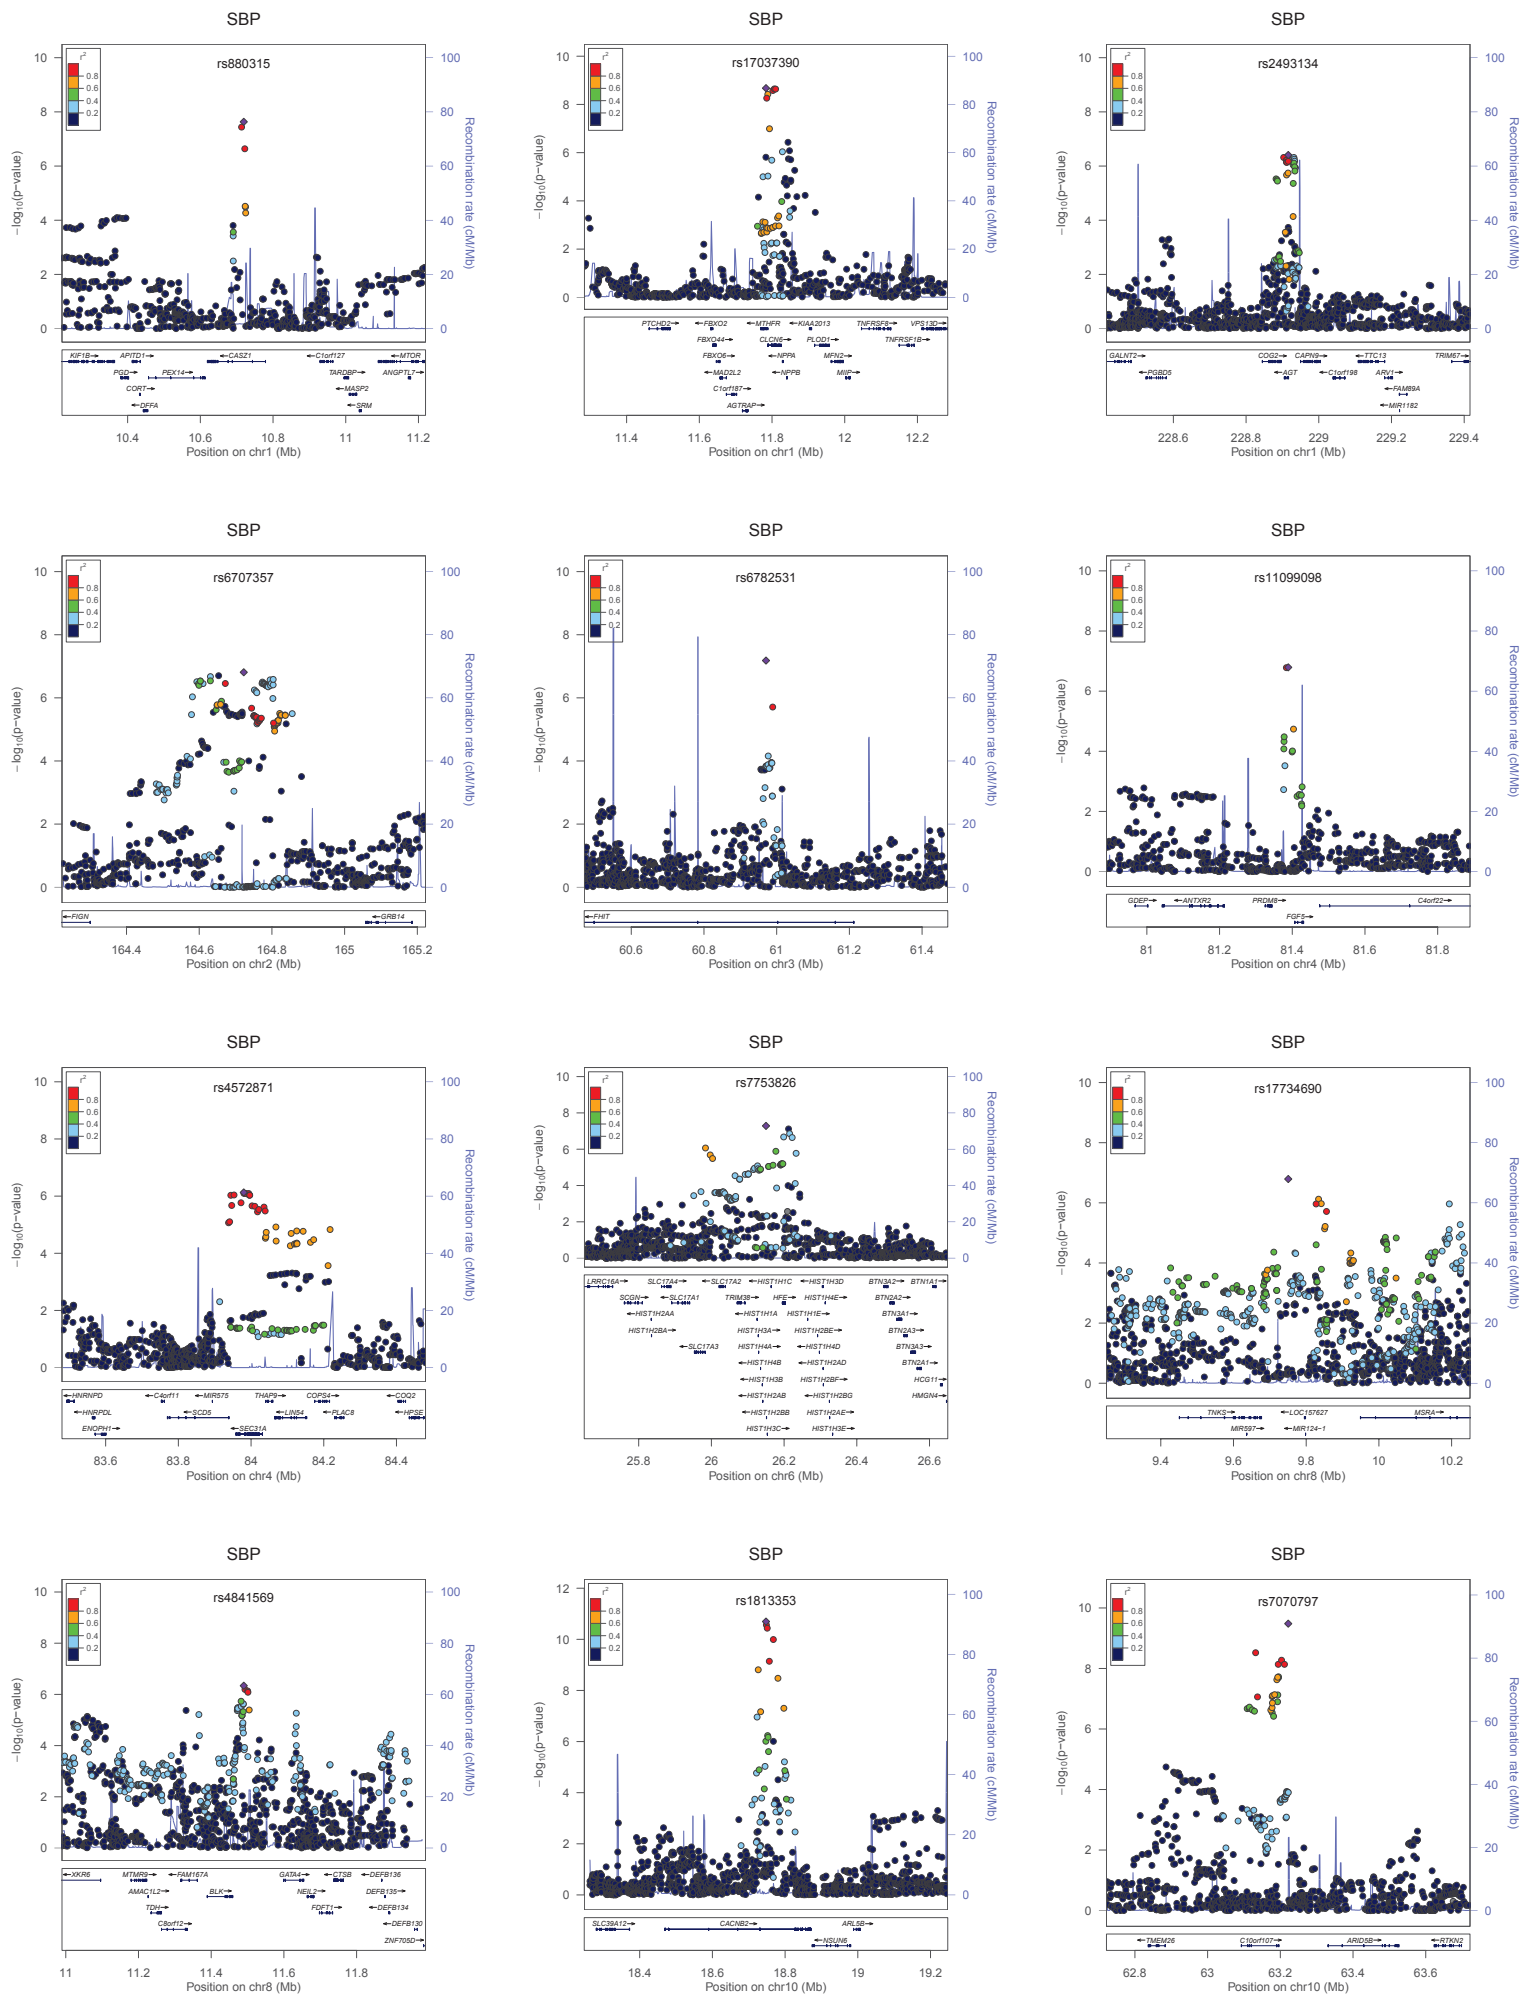

Figure S2: Regional Plots for the Joint 2 DF Te

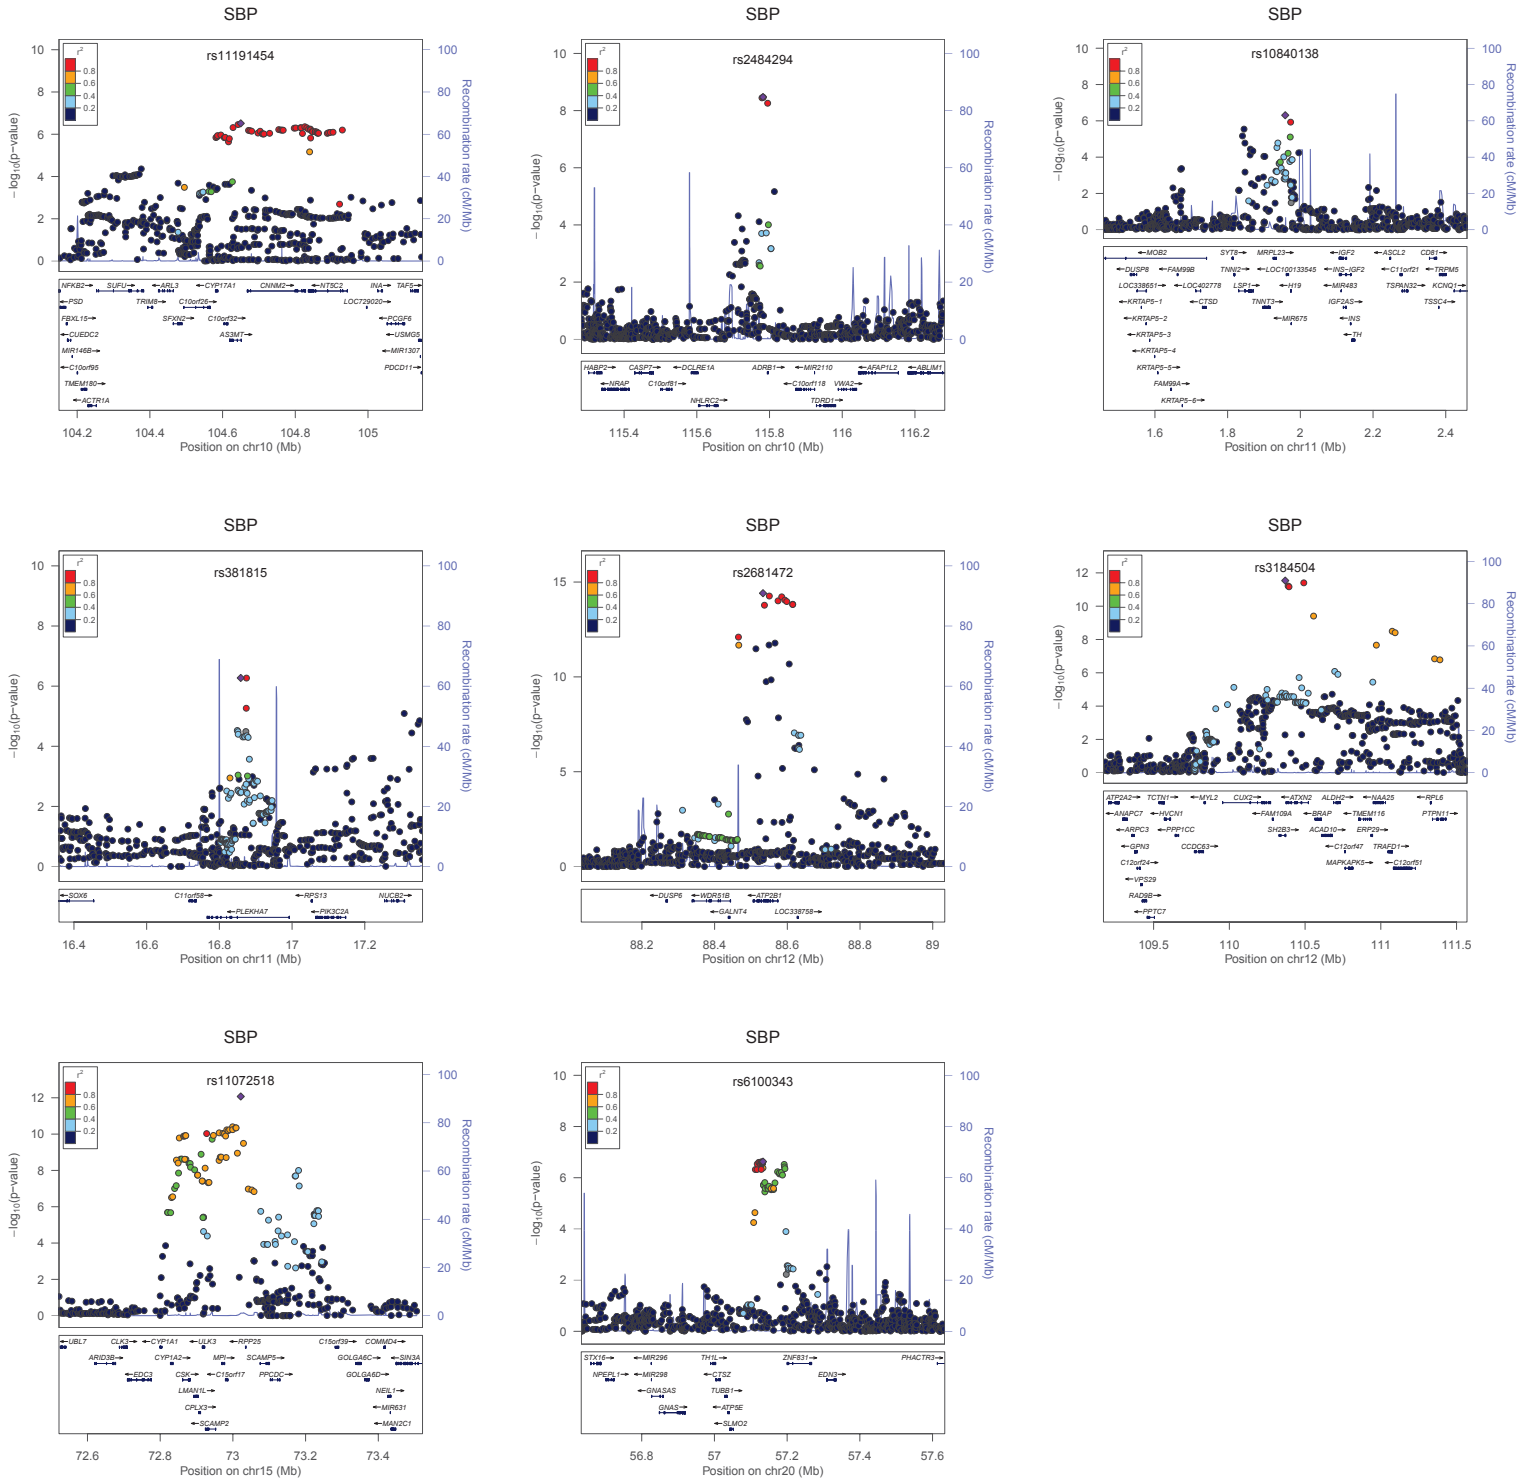



Figure S2: Regional Plots for the Joint 2 DF Te

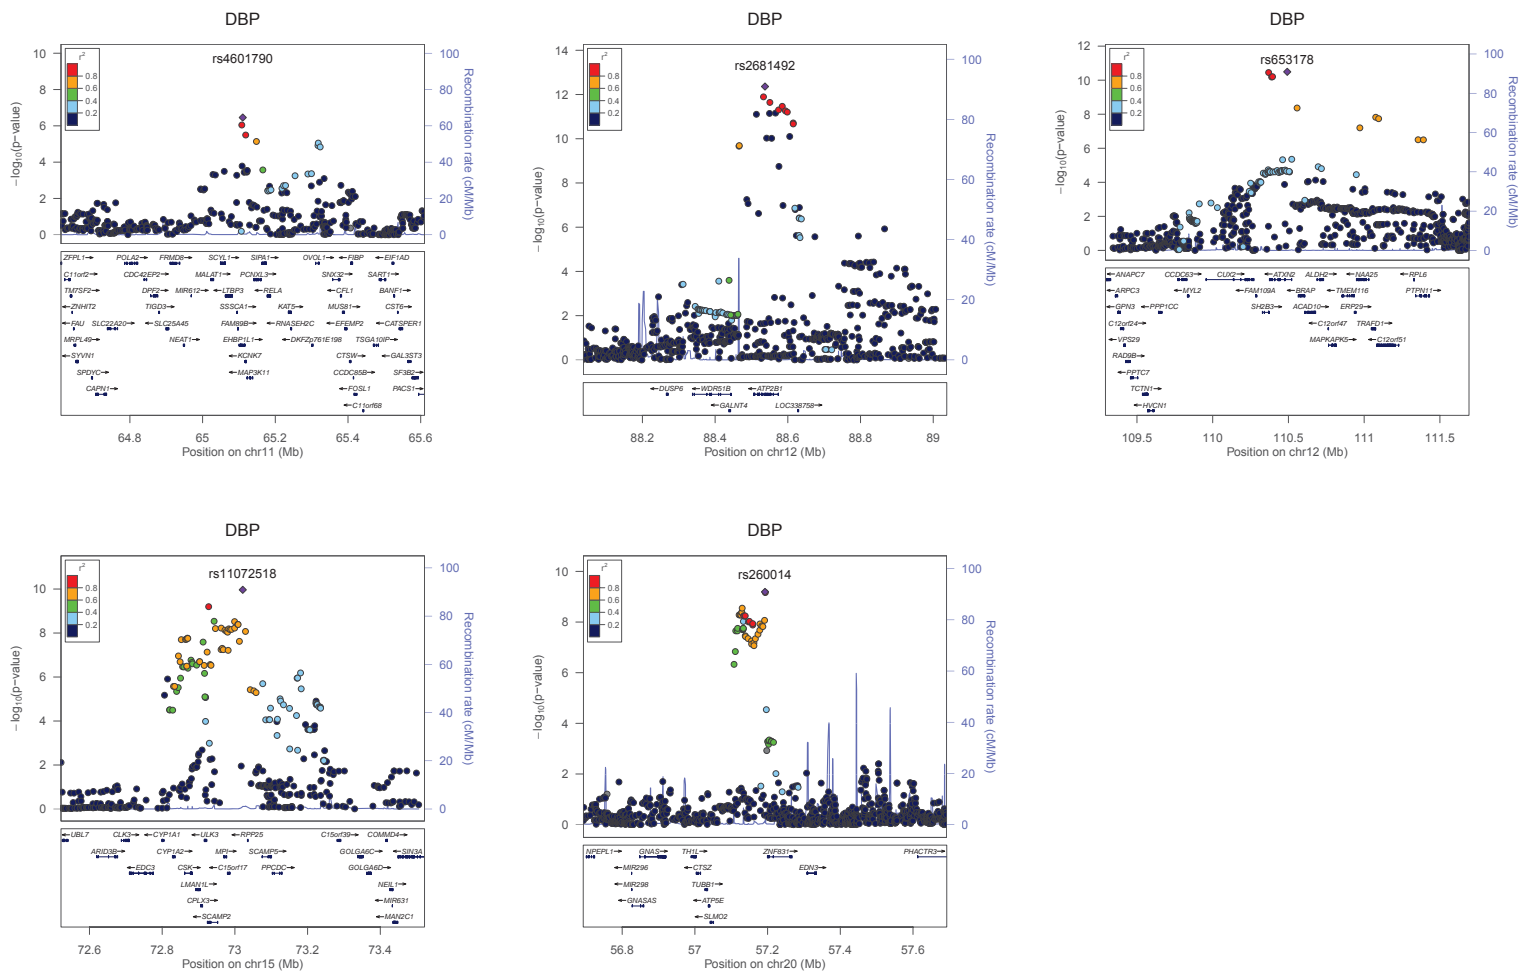

**Figure S2: Regional Plots for the Joint 2 DF Te**

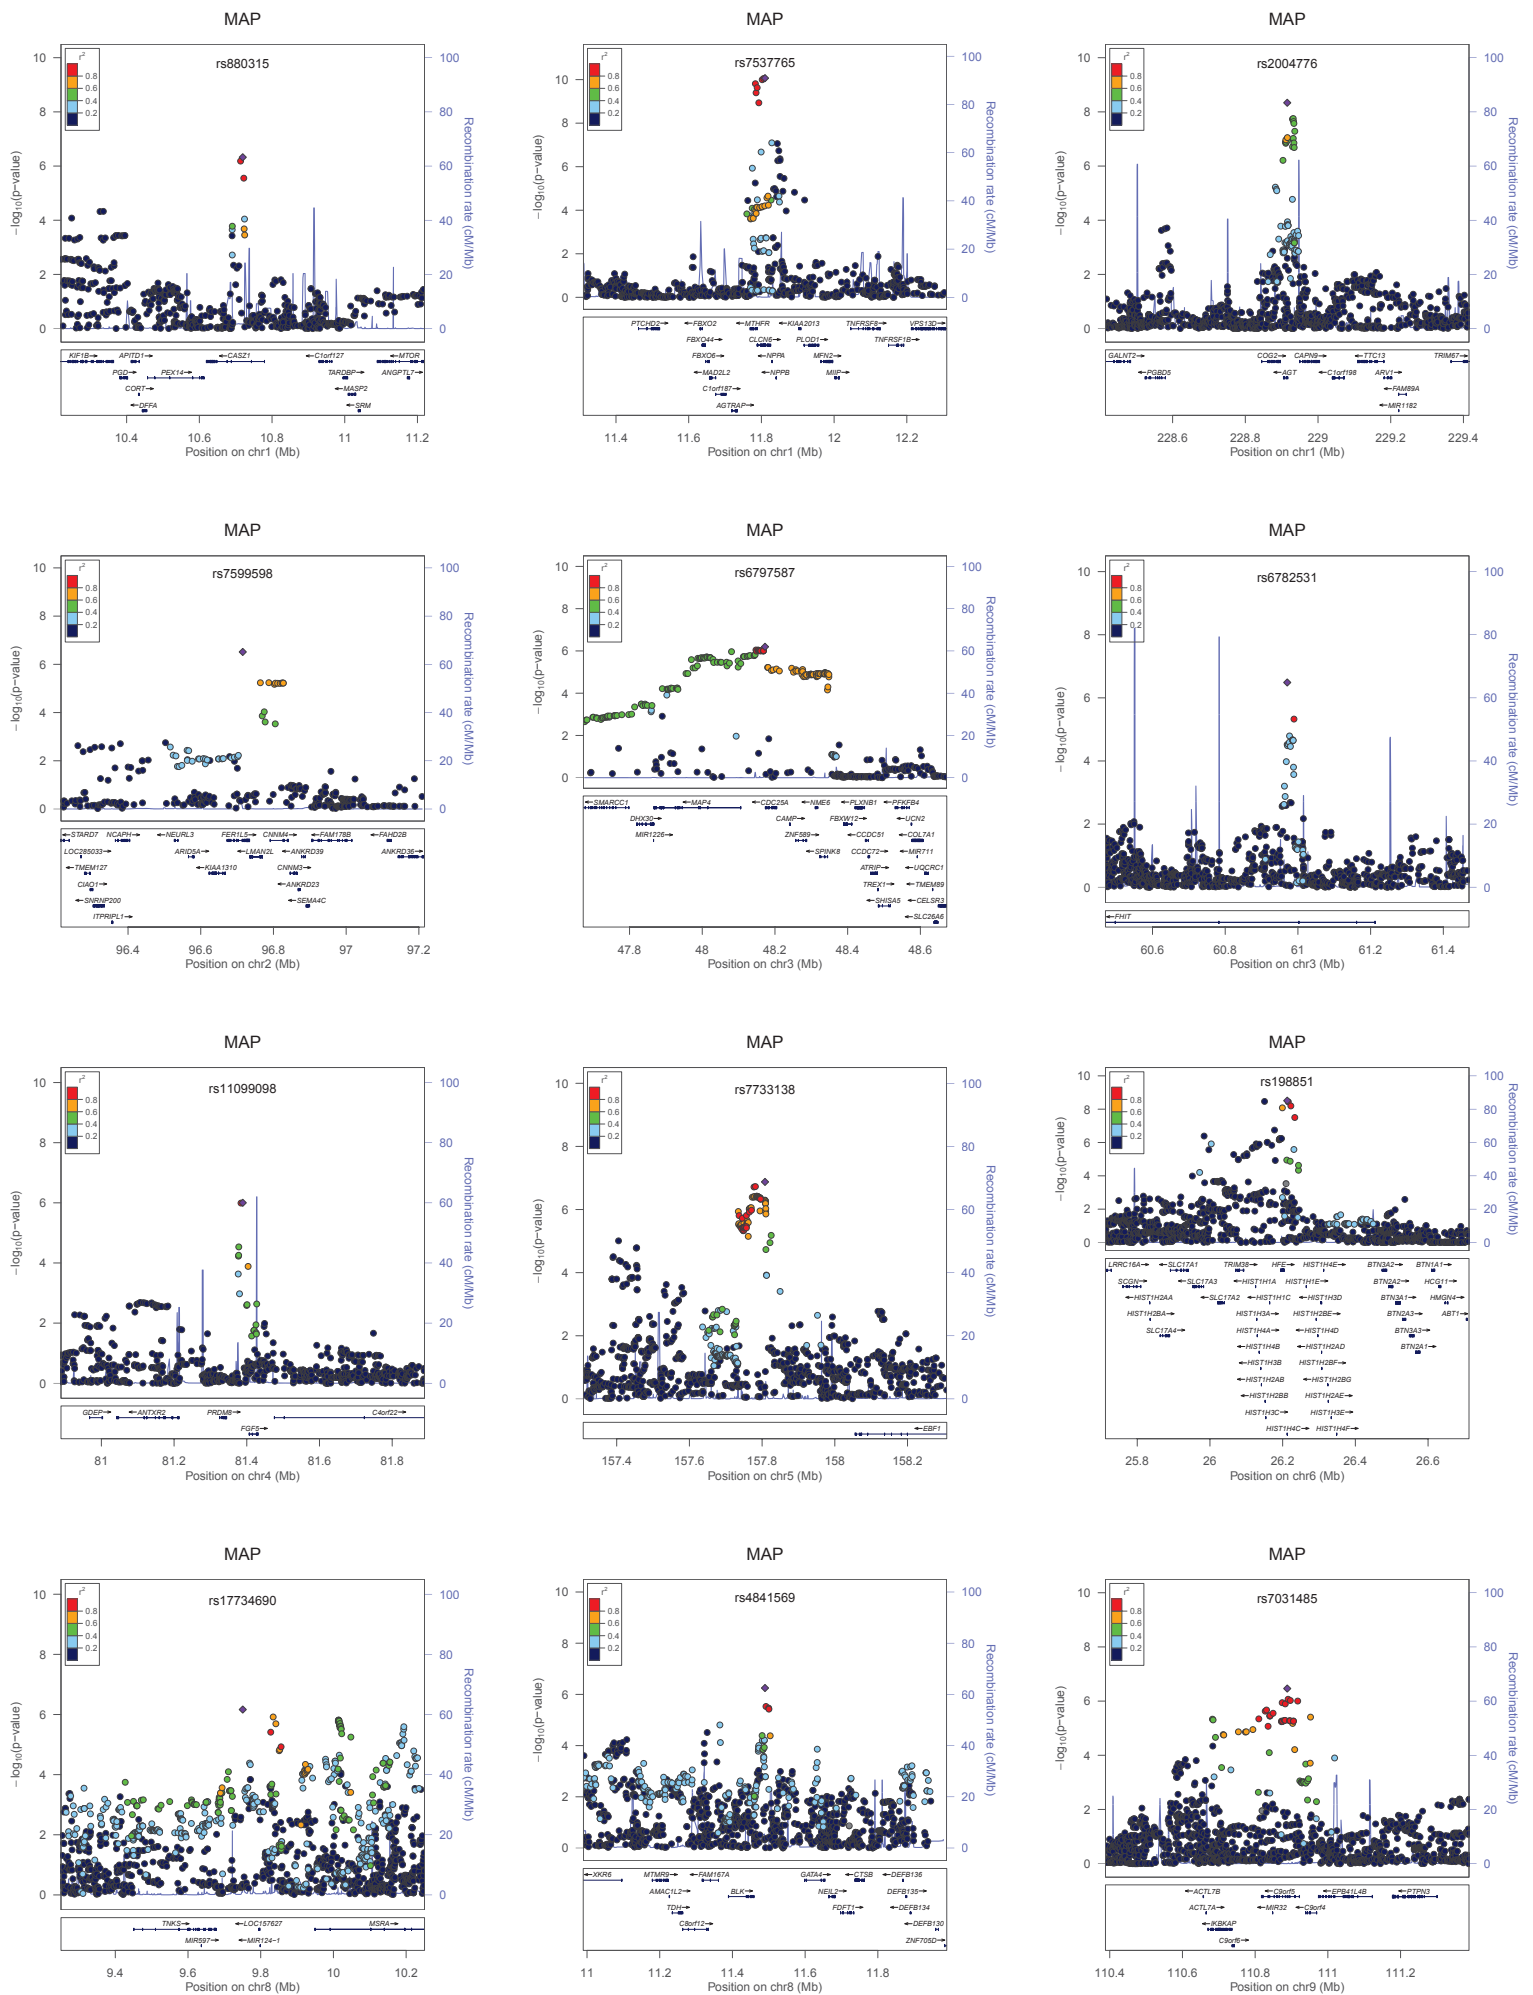



Figure S2: Regional Plots for the Joint 2 DF Test

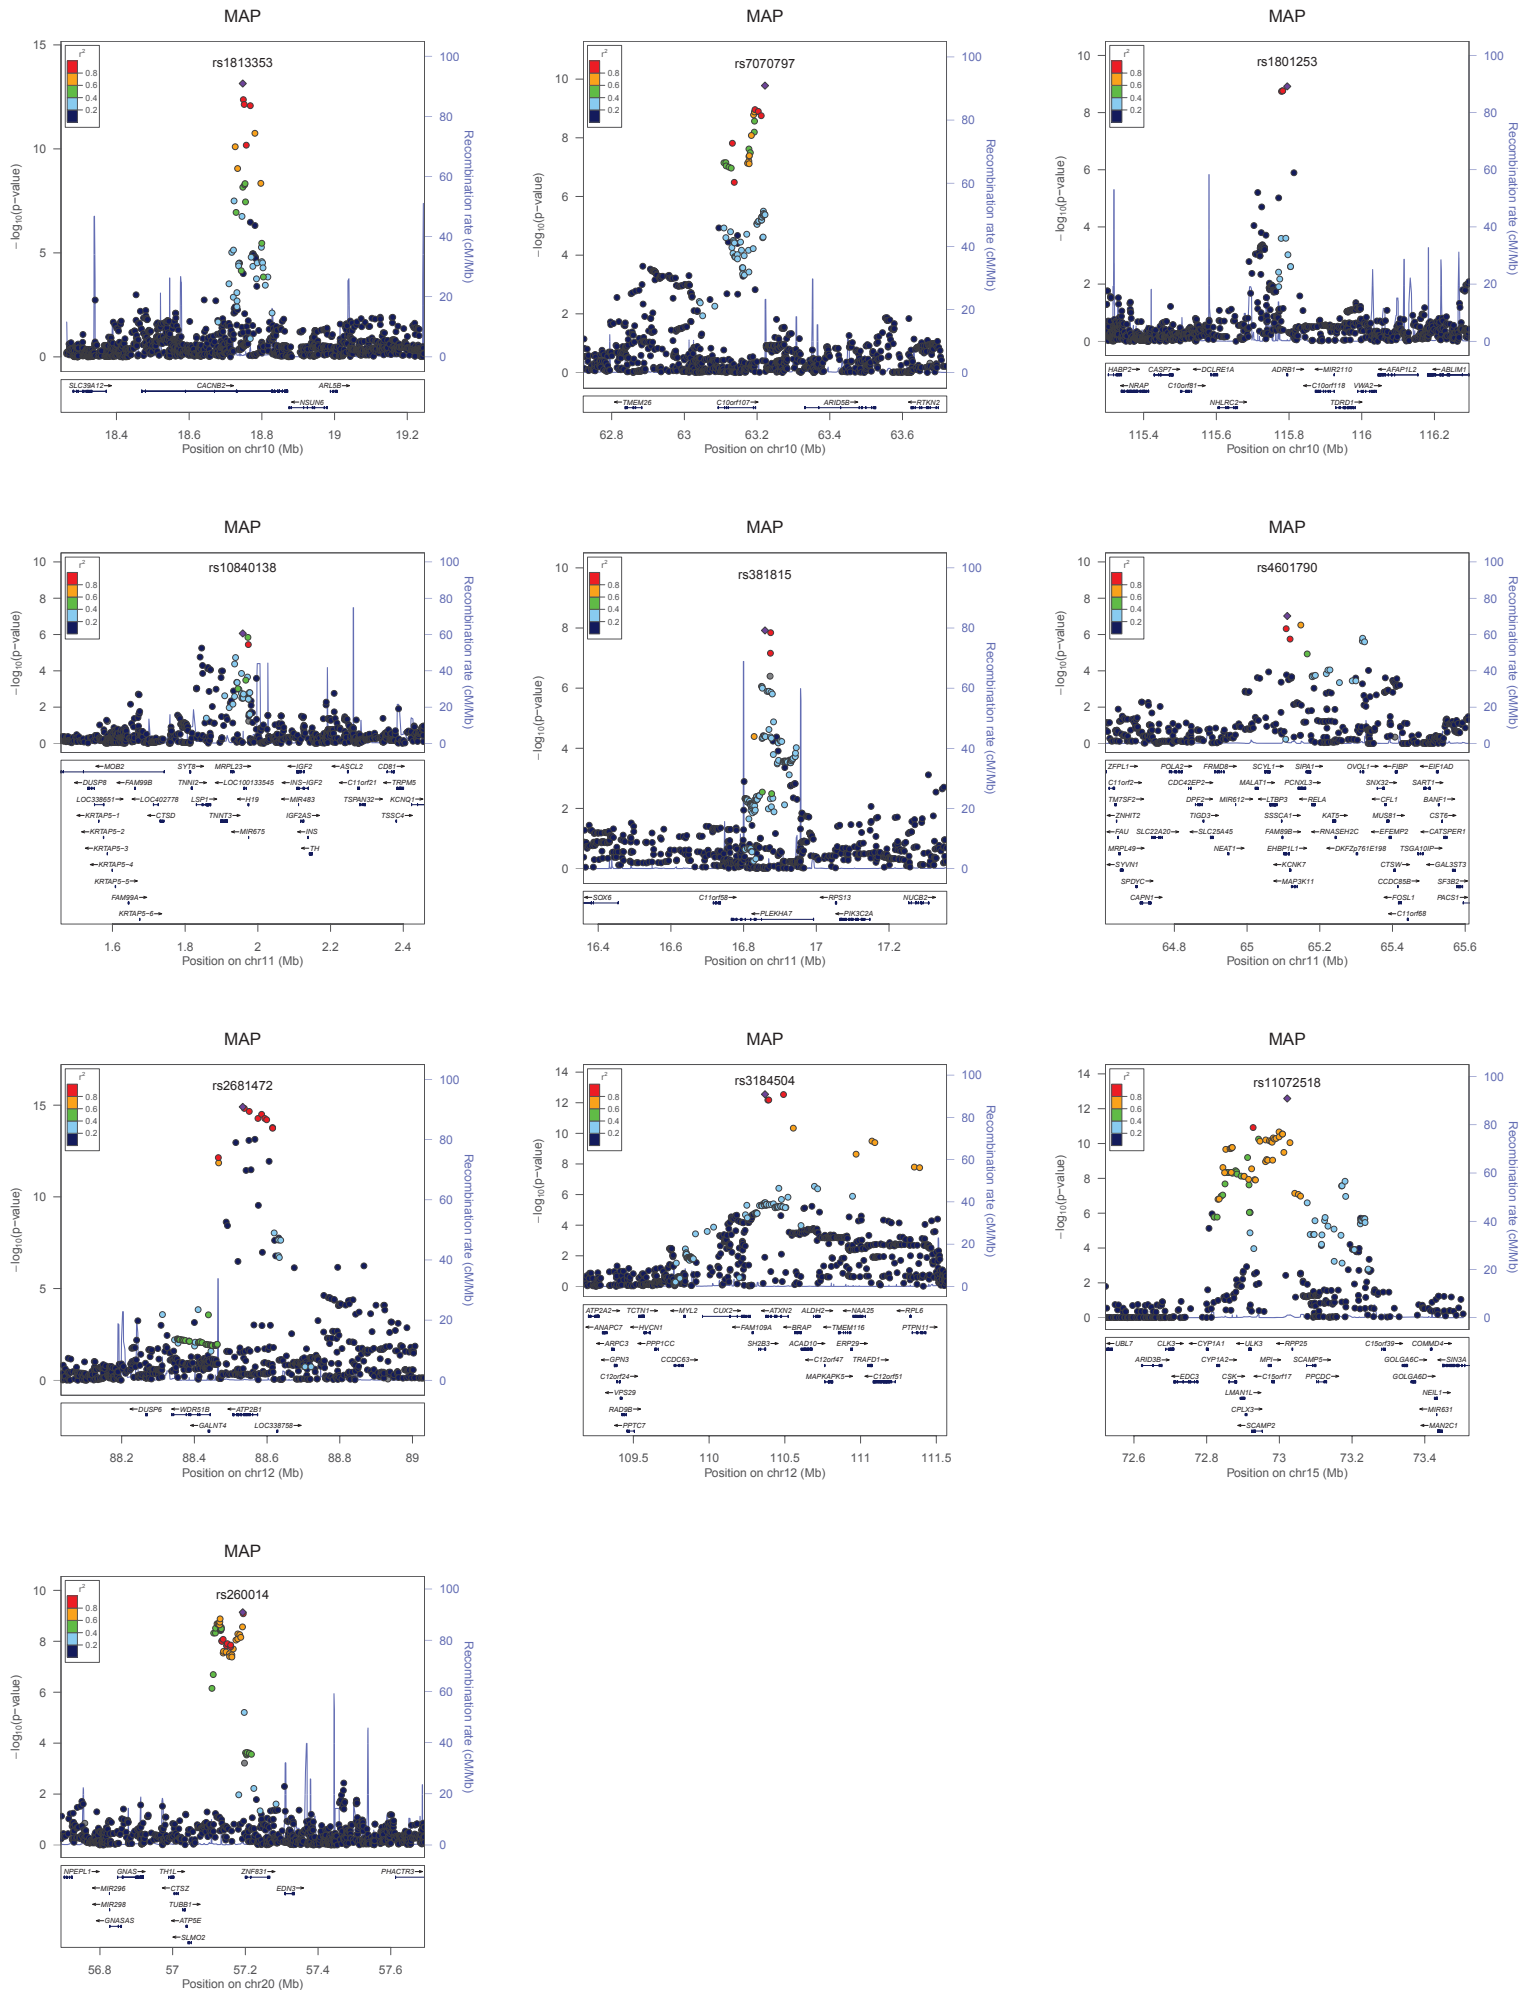

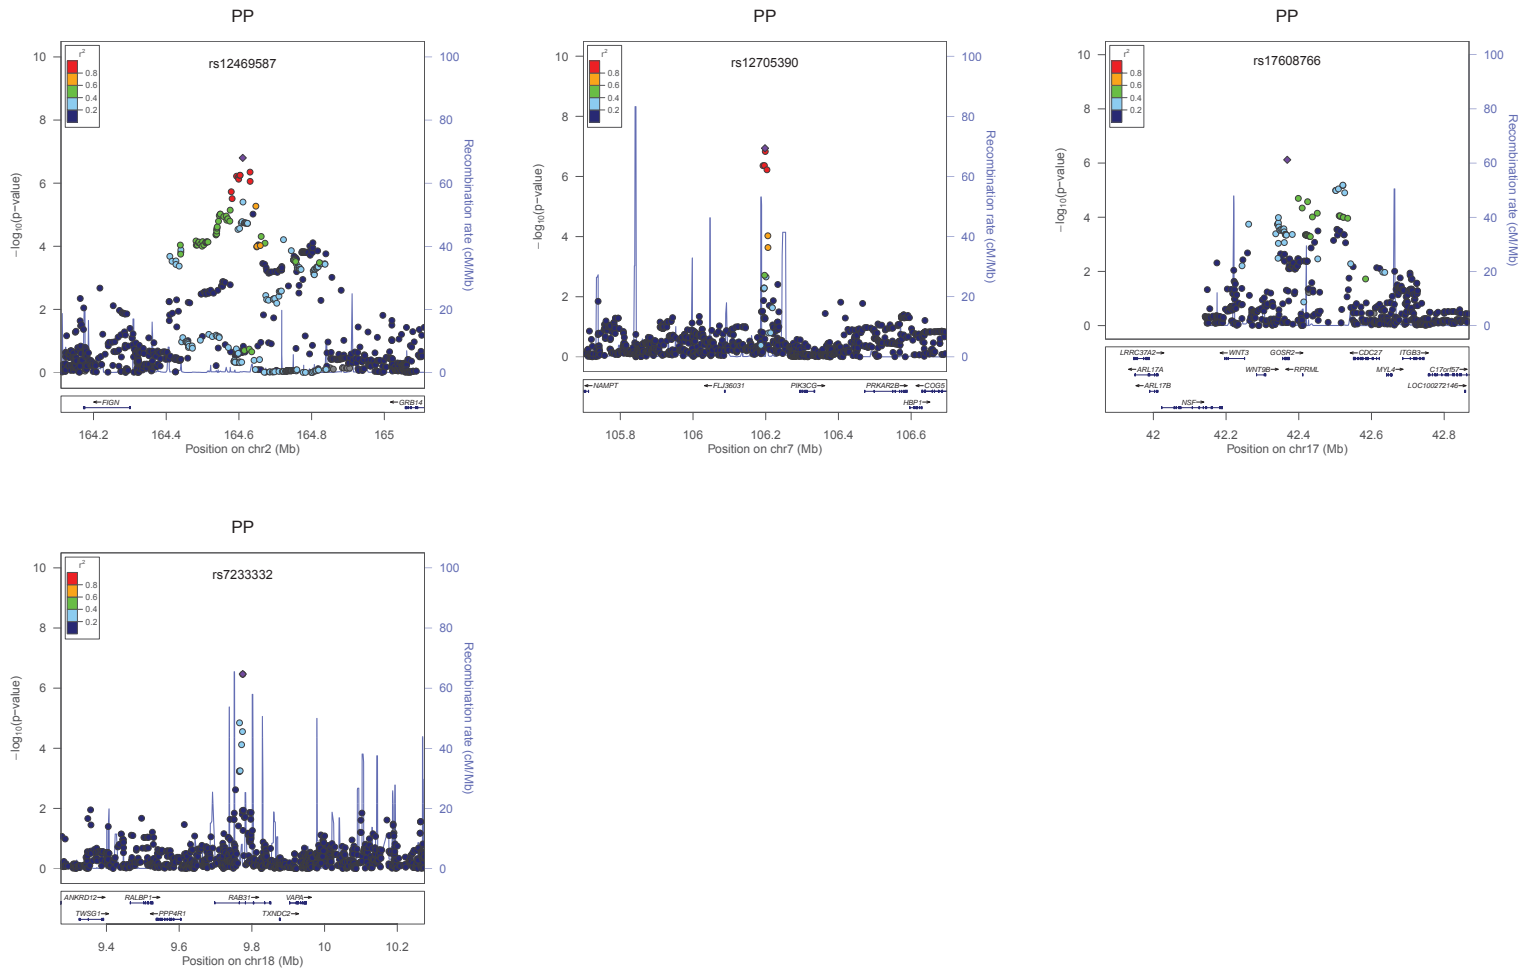

Figure S2: Regional Associations Plots for Suggestive and Significant Loci Identified by the Meta-Regression of Stage 1 Studies (Joint 2df tests of SNP Main Effects and SNP-age Interactions). Plots are presented by trait in ascending chromosome and basepair position.

## STAGE 1 (CHARGE) STUDIES

### Study Descriptions

**The Age Gene/Environment Susceptibility-Reykjavik (AGES) Study** originally comprised a random sample of 30,795 men and women born in 1907-1935 and living in Reykjavik in 1967. A total of 19,381 people attended, resulting in a 71% recruitment rate. The study sample was divided into six groups by birth year and birth date within month. One group was designated for longitudinal follow up and was examined in all stages; another was designated as a control group and was not included in examinations until 1991. Other groups were invited to participate in specific stages of the study. Between 2002 and 2006, the AGES-Reykjavik study re-examined 5,764 survivors of the original cohort who had participated before in the Reykjavik Study<sup>1</sup>. The midlife data blood pressure measurement was taken from stage 3 of the Reykjavik Study (1974-1979), if available. Half of the cohort attended during this period. Otherwise an observation was selected closest in time to the stage 3 visit. The supine blood pressure was measured twice by a nurse using a mercury sphygmomanometer after 5 minutes rest following World Health Organization recommendations<sup>2</sup>. Individuals with previous MI were excluded from the analyses (N=12).

**The Atherosclerosis Risk In Communities (ARIC) Study** is a population-based prospective cohort study of cardiovascular disease sponsored by the National Heart, Lung, and Blood Institute (NHLBI). ARIC included 15,792 individuals aged 45-64 years at baseline (1987-89), chosen by probability sampling from four US communities<sup>3</sup>. Cohort members completed four clinic examinations each spread over about three years, conducted approximately three years apart between 1987 and 1998. A detailed study protocol is available on the ARIC study website (<http://www2.csc.unc.edu/aric/>). Blood pressure was measured using a standardized Hawksley random-zero mercury column sphygmomanometer with participants in a sitting position after a resting period of 5 minutes. The size of the cuff was chosen according to the arm circumference. Three sequential recordings for systolic and diastolic blood pressure were obtained; the mean of the last two measurements was used in this analysis, discarding the first reading. Blood pressure lowering medication use was recorded from the medication history. For this study the sample was restricted to individuals of European descent by self-report and principal component analysis using genome-wide genotypes.

**The Coronary Artery Risk Development in Young Adults (CARDIA) Study** is a prospective multicenter study with 5,115 adults Caucasian and African American participants of the age group 18-30 years, recruited from four centers at the baseline examination in 1985-1986. The recruitment was done from the total community in Birmingham, AL, from selected census tracts in Chicago, IL and Minneapolis, MN; and from the Kaiser Permanente health plan membership in Oakland, CA. The details of the study design for the CARDIA study have been previously

published<sup>4</sup>. Eight examinations have been completed since initiation of the study, respectively in the years 0, 2, 5, 7, 10, 15, 20 and 25. Written informed consent was obtained from participants at each examination and all study protocols were approved by the institutional review boards of the participating institutions. Systolic and diastolic blood pressure was measured in triplicate on the right arm using a random-zero sphygmomanometer with the participant seated and following a 5-min. rest. The average of the second and third measurements was taken as the blood pressure value. Blood pressure medication use was obtained by questionnaire. Baseline data were used for this study. In addition, the sample was restricted to individuals of European descent by self-report and principal component analysis using genome-wide genotypes.

**The Cardiovascular Health Study (CHS)** is a population-based cohort study of risk factors for cardiovascular disease in adults 65 years of age or older conducted across four field centers. The original predominantly white cohort of 5,201 persons was recruited in 1989-1990 from random samples of the Medicare eligibility lists and an additional 687 African-Americans were enrolled in 1992-93 for a total sample of 5,888. Details of the study design are summarized elsewhere<sup>5</sup>. A total of 1,908 persons were excluded from the study sample due to prevalent coronary heart disease (N=1,195), congestive heart failure (N=86), peripheral vascular disease (N=93), valvular heart disease (N=20), stroke (N=166), or transient ischemic attack (N=56). Participants with missing BMI (N=10) or BP measurements (N=8) were also excluded. Research staff with central training in blood pressure measurement assessed repeated right-arm seated systolic and diastolic blood pressure levels at baseline with a Hawksley random-zero sphygmomanometer. Means of the repeated blood pressure measurements from the baseline examination of subjects of European ancestry were used for the analyses.

**The Framingham Heart Study (FHS)** began in 1948 with the recruitment of an original cohort of 5,209 men and women (mean age 44 years; 55 percent women). In 1971 a second generation of study participants was enrolled; this cohort (mean age 37 years; 52% women) consisted of 5,124 children and spouses of children of the original cohort. A third generation cohort of 4,095 children of offspring cohort participants (mean age 40 years; 53 percent women) was enrolled beginning in 2002. Details of study designs for the three cohorts are summarized elsewhere<sup>6-8</sup>. At each clinic visit, a medical history was obtained with a focus on cardiovascular content, and participants underwent a physical examination including measurement of height and weight from which BMI was calculated. Systolic and diastolic blood pressures were measured twice by a physician on the left arm of the resting and seated participant using a mercury column sphygmomanometer. Blood pressures were recorded to the nearest even number. The means of two separate systolic and diastolic blood pressure readings at each clinic examination were used for statistical analyses. To maximize the number of participants with age ranged from 20 to 80, we applied blood pressure measurements for the original cohort at the tenth examination, the second generation at the third examination, and the third generation at the first examination for GWAS. Individuals who had a myocardial infarction or congestive heart failure were excluded from the analyses because those conditions may affect blood pressure levels. We excluded participants with extreme values of systolic blood

pressures (greater or less than mean $\pm$  4 standard deviations) for the GWAS.

**The Multi-Ethnic Study of Atherosclerosis (MESA)** investigation is a population-based study of 6,814 men and women age 45 to 85 years, without clinical cardiovascular disease, recruited from six United States communities (Baltimore, MD; Chicago, IL; Forsyth County, NC; Los Angeles County, CA; northern Manhattan, NY; and St. Paul, MN). The main objective of MESA is to determine the characteristics of subclinical cardiovascular disease and its progression. Sampling and recruitment procedures have been previously described in detail<sup>9</sup>. Adults with symptoms or history of medical or surgical treatment for cardiovascular disease were excluded. During the recruitment process, potential participants were asked about their race/ethnicity. Self-reported ethnicity was used to classify participants into groups<sup>10</sup>. After a 5-minute rest BP was measured three times at 1 minute intervals using a Dinamap PRO 100 automated oscillometric device (Critikon, Tampa, FL) with the subject seated, and the average of the second and third BP measurements was used in the analysis. This analysis included only individuals of European descent.

**The Rotterdam Study (RS-I) and Rotterdam Extension Study (RS-II)** are prospective population-based cohort studies; the RS-I comprises 7,983 subjects aged 55 years or older. Participants completed an interview at home and at the research center, where participants were subsequently examined. Baseline data were collected between 1990 and 1993. In 1999, inhabitants who turned 55 years of age or moved into the study district since the start of the study were invited to participate in an extension of the RS (RS-II), 3,011 participated (67% response rate). The rationale and design of the RS have been described in detail elsewhere<sup>11-13</sup>. At the research center, two seated blood pressure measurements of the right brachial artery were obtained with a random zero sphygmomanometer. The mean of two consecutive measurements was used in association analyses. Participants who had a history myocardial infarction or congestive heart failure were excluded because of the impact of these conditions on blood pressure levels.

**The Women's Genome Health Study (WGHS)** is a prospective cohort of female North American health care professionals representing participants in the Women's Health Study (WHS) trial who provided a blood sample at baseline and consent for blood-based analyses<sup>14</sup>. Participants in the WHS were 45 years or older at enrollment and free of cardiovascular disease, cancer or other major chronic illness. The current data are derived from 23,294 WGHS participants for whom whole genome genotype information was available at the time of analysis and for whom self-reported European ancestry could be confirmed by multidimensional scaling analysis of 1,443 ancestry informative markers in PLINK v. 1.06. Baseline BP in the WGHS was ascertained by a self-reported questionnaire, an approach which has been validated in the WGHS demographic, namely female health care professionals<sup>15-17</sup>. Questionnaires recorded systolic blood pressure in 9 categories (<110, 110-119, 120-129, 130-

139, 140-149, 150-159, 160-169, 170-179,  $\geq 180$  mmHg), and diastolic blood pressure in 7 categories (<65, 65-74, 75-84, 85-89, 90-94, 95-104,  $\geq 105$  mmHg). We adjusted for antihypertensive medication use (SBP + 10 mmHg and DBP + 5 mmHg) when assigning WGHS participants to BP categories. The midpoint of each category was used for this analysis.

**Table S1: Descriptive Statistics for the Stage 1 (CHARGE) Studies**

| Discovery Study | Age Bin | N      | Median Age | Female (%) | HT (%) | BMI Mean (SD) | SBP Mean (SD) | DBP Mean (SD) | MAP Mean (SD) | PP Mean (SD) |
|-----------------|---------|--------|------------|------------|--------|---------------|---------------|---------------|---------------|--------------|
| AGES            | [40,50) | 1,260  | 45         |            |        |               |               |               |               |              |
|                 | [50,60) | 1,603  | 54         |            |        |               |               |               |               |              |
|                 | [60,70) | 265    | 62         |            |        |               |               |               |               |              |
| ARIC            | [40,50) | 2,392  | 47         | 56.9       | 17.2   | 26.8 (5.1)    | 112.8 (14.4)  | 71.3 (9.9)    | 85.1 (10.7)   | 41.5 (9.3)   |
|                 | [50,60) | 4,772  | 54         | 52.6       | 24.9   | 27.0 (4.8)    | 118.0 (16.1)  | 71.9 (9.8)    | 87.2 (10.9)   | 46.1 (11.7)  |
|                 | [60,70) | 2,142  | 62         | 48.8       | 35.3   | 27.0 (4.5)    | 125.0 (17.6)  | 71.1 (10.0)   | 89.1 (11.2)   | 53.9 (14.2)  |
| CARDIA†         | [17,32) | 1,713  | 26         | 52.4       | 2.1    | 23.7 (3.8)    | 109.3 (10.9)  | 68.3 (9.0)    | 82.0 (8.6)    | 41.0 (9.0)   |
| CHS             | [60,70) | 1,230  | 68         | 66.0       | 47.0   | 26.8 (4.8)    | 134.6 (20.6)  | 74.8 (12.4)   | 94.7 (13.7)   | 59.8 (15.7)  |
|                 | [70,80) | 1,672  | 73         | 59.5       | 55.0   | 26.1 (4.3)    | 139.8 (22.6)  | 73.8 (12.8)   | 95.8 (14.2)   | 66.1 (18.5)  |
| FHS             | [20,30) | 533    | 26         | 52.2       | 0.9    | 25.3 (5.0)    | 112.9 (11.7)  | 71.6 (9.2)    | 85.4 (9.2)    | 41.4 (9.1)   |
|                 | [30,40) | 1,926  | 36         | 54.2       | 3.6    | 26.0 (5.1)    | 114.0 (12.5)  | 74.8 (9.6)    | 87.9 (10.0)   | 39.2 (7.8)   |
|                 | [40,50) | 2,608  | 44         | 53.6       | 9.2    | 26.8 (5.3)    | 119.6 (15.0)  | 77.9 (9.8)    | 91.8 (10.9)   | 41.8 (9.4)   |
|                 | [50,60) | 1,916  | 54         | 54.6       | 16.8   | 26.8 (4.8)    | 128.9 (18.0)  | 80.6 (10.1)   | 96.7 (12.0)   | 48.3(12.3)   |
|                 | [60,70) | 537    | 62         | 54.6       | 27.9   | 26.7 (4.3)    | 138.3 (20.1)  | 81.5 (10.1)   | 100.4(12.3)   | 56.9(14.9)   |
| MESA            | [40,50) | 342    | 48         | 53.2       | 14.9   | 27.5 (5.6)    | 112.9 (15.8)  | 70.2 (10.3)   | 84.5 (11.6)   | 42.9 (9.7)   |
|                 | [50,60) | 708    | 55         | 52.8       | 28.3   | 28.2 (5.4)    | 119.9 (18.8)  | 71.9 (10.4)   | 87.9 (12.3)   | 47.8 (12.8)  |
|                 | [60,70) | 726    | 66         | 50.3       | 44.2   | 28.0 (5.0)    | 130.3 (21.0)  | 72.8 (10.3)   | 92.0 (12.5)   | 57.7 (16.5)  |
|                 | [70,80) | 563    | 75         | 50.8       | 53.6   | 27.0 (4.3)    | 136.5 (22.4)  | 71.3 (10.3)   | 93.0 (13.0)   | 65.3 (17.4)  |
| RS I            | [50,60) | 910    | 58         | 58.5       | 35.6   | 25.9 (3.4)    | 129.3 (20.4)  | 75.0 (11.0)   | 93.0 (14.0)   | 56.0 (15.0)  |
|                 | [60,70) | 2,060  | 65         | 57.7       | 51.8   | 26.4 (3.6)    | 137.3 (20.8)  | 75.0 (12.0)   | 97.0 (14.0)   | 64.0 (17.0)  |
|                 | [70,80) | 1,419  | 74         | 62.8       | 65.8   | 26.3 (3.7)    | 144.9 (21.3)  | 75.0 (12.0)   | 99.0 (14.0)   | 73.0 (18.0)  |
| RS II           | [50,60) | 740    | 58         | 54.9       | 50.7   | 27.4 (4.7)    | 137.8 (19.1)  | 90.0 (11.0)   | 100.0 (13.0)  | 59.0 (14.0)  |
|                 | [60,70) | 851    | 63         | 53.8       | 58.4   | 27.3 (4.0)    | 142.0 (20.1)  | 81.0 (11.0)   | 102.0 (13.0)  | 64.0 (17.0)  |
|                 | [70,80) | 321    | 75         | 58.9       | 78.5   | 26.9 (3.6)    | 152.1 (21.7)  | 79.0 (11.0)   | 104.0 (14.0)  | 76.0 (18.0)  |
| WGHS            | [40,50) | 7,219  | 47         | 100.0      | 15.5   | 25.9 (5.3)    | 120.5 (12.9)  | 75.4 (9.5)    | 90.5 (10.0)   | 45.1 (8.5)   |
|                 | [50,60) | 10,386 | 53         | 100.0      | 24.2   | 26.0 (4.9)    | 124.6 (15.0)  | 77.5 (9.7)    | 93.2 (10.8)   | 46.9 (9.6)   |
|                 | [60,70) | 4,271  | 63         | 100.0      | 37.2   | 25.8 (4.6)    | 131.0 (16.5)  | 79.6 (9.6)    | 96.7 (11.0)   | 51.3 (11.6)  |
|                 | [70,80) | 711    | 72         | 100.0      | 45.7   | 24.9 (3.9)    | 135.0 (16.4)  | 79.6 (9.1)    | 98.1 (10.4)   | 55.4 (12.9)  |

† Except for N and the median age, the descriptive statistics for CARDIA were derived on those 20 to 30 years old.

**Table S2: Genotyping, Imputation, and Analysis Software Information for the Stage 1 (CHARGE) Studies**

| Discovery Study | Genotyping Platform                              | NCBI human genome reference used | Imputation Procedure                                                                                                   | Pre-Imputation QC filter information                                                                                                                                                                                                                                                                                                                                                              | Pre-Association Filters (sample or SNP)                                  | Association Analysis Software                         |
|-----------------|--------------------------------------------------|----------------------------------|------------------------------------------------------------------------------------------------------------------------|---------------------------------------------------------------------------------------------------------------------------------------------------------------------------------------------------------------------------------------------------------------------------------------------------------------------------------------------------------------------------------------------------|--------------------------------------------------------------------------|-------------------------------------------------------|
| AGES            | Illumina 370 CNV                                 | NCBI36/HapMap22                  | MACH                                                                                                                   |                                                                                                                                                                                                                                                                                                                                                                                                   |                                                                          | R & ProbABEL                                          |
| ARIC            | Affymetrix 6.0                                   |                                  | MACH                                                                                                                   |                                                                                                                                                                                                                                                                                                                                                                                                   |                                                                          |                                                       |
| CARDIA          | Affymetrix 6.0                                   | Build 36                         | BEAGLE with reference HapMap2, release 22                                                                              | Sample: Call rate $\geq 98\%$ ; duplicate samples, gender mismatch; outlier in PCA.<br><br>SNP: MAF $\geq 2\%$ ; SNP call rate $\geq 95\%$ ; HWE $\geq 10^{-4}$                                                                                                                                                                                                                                   | Imputation quality $R^2 > 0.3$ ; MAF $\geq 1\%$                          | ProbABEL                                              |
| CHS             | Illumina 370 CNV                                 | Build 36, release 22             | BIMBAM, single imputation of posterior mean genotype (dosage); CEPH Build 36 reference haplotypes; Build 36 positions. | Samples were excluded from analysis for: sex mismatch, discordance with prior genotyping, or call rate $< 95\%$ .<br>SNPs: the following exclusions were applied to identify a final set of 306,655 autosomal SNPs: call rate $< 97\%$ , HWE $P < 10^{-5}$ , $> 2$ duplicate errors or Mendelian inconsistencies (for reference CEPH trios), heterozygote frequency = 0, SNP not found in HapMap. | Variance of imputed SNP dosage $< 0.01$                                  | R                                                     |
| FHS             | Affymetrix 500k and MIPS 50K combined            | 36.2                             | MACH                                                                                                                   | Call-rate $\geq 97\%$ , HWE $p \leq 10^{-6}$ , Mishap $p < 1e-9$                                                                                                                                                                                                                                                                                                                                  | Call-rate $\geq 97\%$ , subject heterozygosity $\leq 5$ SD from the mean | R statistics, LMEKIN. the linear mixed model for GWAS |
| MESA            | Affymetrix 6.0                                   | 36.3                             | HapMap1+2 IMPUTE2                                                                                                      | Not Applicable                                                                                                                                                                                                                                                                                                                                                                                    | HWE $\geq 1E-6$<br>MAF $\geq 0.01$                                       | SNPTEST v 2.1.1                                       |
| RS I & RS II    | Illumina 550 K                                   | 36                               | MACH, Hapmap r22 (build 36)                                                                                            |                                                                                                                                                                                                                                                                                                                                                                                                   |                                                                          | ProbABEL                                              |
| WGHS            | Illumina Human-Hap300 Duo-plus BeadChip platform | 36                               | Imputation used HapMap2 CEU r.22 reference panel with MaCH v. 1.0.16                                                   | HWE p-value $< 10^{-6}$                                                                                                                                                                                                                                                                                                                                                                           | None                                                                     | ProbABEL                                              |



**Table S3: Genomic Inflation Factors of the GWAS Results from Each Stage 1 (CHARGE) Study and Age Bin**

| Study  | Age Bin | SBP                       |                          | DBP                       |                          | MAP                       |                          | PP                        |                          |
|--------|---------|---------------------------|--------------------------|---------------------------|--------------------------|---------------------------|--------------------------|---------------------------|--------------------------|
|        |         | # SNPs after QC filtering | Genomic Inflation Factor | # SNPs after QC filtering | Genomic Inflation Factor | # SNPs after QC filtering | Genomic Inflation Factor | # SNPs after QC filtering | Genomic Inflation Factor |
| AGES   | 3       | 2,367,558                 | 1.003                    | 2,367,573                 | 1.005                    | 2,367,573                 | 1.004                    | 2,367,573                 | 1.002                    |
|        | 4       | 2,391,184                 | 1.055                    | 2,391,199                 | 1.044                    | 2,391,199                 | 1.052                    | 2,391,199                 | 1.049                    |
|        | 5       | 1,973,973                 | 1.012                    | 1,973,977                 | 1.023                    | 1,973,977                 | 1.018                    | 1,973,977                 | 1.003                    |
| ARIC   | 3       | 2,458,877                 | 1.020                    | 2,458,877                 | 1.011                    | 2,458,877                 | 1.010                    | 2,458,877                 | 1.023                    |
|        | 4       | 2,481,308                 | 1.024                    | 2,481,308                 | 1.028                    | 2,481,308                 | 1.030                    | 2,481,308                 | 1.011                    |
|        | 5       | 2,453,141                 | 1.022                    | 2,453,141                 | 1.010                    | 2,453,141                 | 1.026                    | 2,453,141                 | 1.018                    |
| CARDIA | 1       | 2,272,313                 | 1.017                    | 2,272,244                 | 1.001                    | 2,272,244                 | 1.001                    | 2,272,244                 | 1.014                    |
| CHS    | 5       | 2,186,656                 | 1.024                    | 2,186,085                 | 1.021                    | 2,186,085                 | 1.021                    | 2,186,085                 | 1.023                    |
|        | 6       | 2,190,440                 | 1.015                    | 2,189,859                 | 1.027                    | 2,189,859                 | 1.024                    | 2,189,859                 | 1.013                    |
| FHS    | 1       | 2,135,392                 | 1.040                    | 2,224,899                 | 1.038                    | 2,224,373                 | 1.036                    | 2,224,899                 | 1.015                    |
|        | 2       | 2,333,148                 | 1.035                    | 2,405,991                 | 1.017                    | 2,406,012                 | 1.025                    | 2,406,012                 | 1.019                    |
|        | 3       | 2,352,606                 | 1.027                    | 2,421,561                 | 1.013                    | 2,421,543                 | 1.018                    | 2,421,487                 | 1.023                    |
|        | 4       | 2,377,100                 | 1.020                    | 2,405,583                 | 1.007                    | 2,405,662                 | 1.014                    | 2,405,428                 | 1.022                    |
|        | 5       | 2,192,250                 | 1.049                    | 2,226,881                 | 1.049                    | 2,226,881                 | 1.057                    | 2,221,888                 | 1.046                    |
| MESA   | 3       | *2,210,077                | 1.008                    | 2,190,470                 | 1.010                    | 2,190,470                 | 1.011                    | 2,190,470                 | 1.012                    |
|        | 4       | *2,428,339                | 0.997                    | 2,401,091                 | 1.010                    | 2,401,091                 | 1.007                    | 2,401,091                 | 0.977                    |
|        | 5       | *2,431,813                | 1.012                    | 2,403,807                 | 0.993                    | 2,403,807                 | 1.001                    | 2,403,807                 | 1.008                    |
|        | 6       | *2,376,153                | 1.013                    | 2,351,180                 | 0.997                    | 2,351,180                 | 1.004                    | 2,351,180                 | 1.011                    |
| RS I   | 4       | 2,361,278                 | 1.010                    | 2,361,278                 | 1.005                    | 2,361,278                 | 1.009                    | 2,361,278                 | 1.004                    |
|        | 5       | 2,449,265                 | 1.005                    | 2,449,265                 | 1.018                    | 2,449,265                 | 1.011                    | 2,449,265                 | 1.012                    |
|        | 6       | 2,418,155                 | 1.008                    | 2,418,155                 | 1.000                    | 2,418,155                 | 1.001                    | 2,418,155                 | 0.997                    |
| RS II  | 4       | 2,322,498                 | 1.000                    | 2,322,498                 | 1.004                    | 2,322,498                 | 1.000                    | 2,322,498                 | 1.000                    |
|        | 5       | 2,349,165                 | 1.002                    | 2,349,165                 | 1.003                    | 2,349,165                 | 1.001                    | 2,349,165                 | 1.000                    |
|        | 6       | 2,077,844                 | 1.004                    | 2,077,844                 | 1.014                    | 2,077,844                 | 1.012                    | 2,077,844                 | 0.998                    |
| WGHS   | 3       | 2,477,551                 | 1.045                    | 2,477,551                 | 1.029                    | 2,477,551                 | 1.040                    | 2,477,551                 | 1.031                    |
|        | 4       | 2,481,199                 | 1.047                    | 2,481,199                 | 1.038                    | 2,481,199                 | 1.051                    | 2,481,159                 | 1.019                    |
|        | 5       | 2,468,197                 | 1.017                    | 2,468,197                 | 1.009                    | 2,468,197                 | 1.010                    | 2,468,142                 | 1.015                    |

|  |   |           |       |           |       |           |       |           |       |
|--|---|-----------|-------|-----------|-------|-----------|-------|-----------|-------|
|  | 6 | 2,308,858 | 1.006 | 2,308,858 | 1.013 | 2,308,858 | 1.010 | 2,308,858 | 1.001 |
|--|---|-----------|-------|-----------|-------|-----------|-------|-----------|-------|

\* Some SNPs in the MESA datasets were exclusive to that cohort and did not match back to our HapMap legend file.

For SBP in MESA: We analyzed 2,117,061 SNPs in age bin 3; 2,327,960 in age bin 4; 2,331,257 in age bin 5; and 2,277,690 in age bin 6

For DBP, MAP, and PP in MESA: We analyzed 2,097,712 in age bin 3; 2,301,058 in age bin 4; 2,303,611 in age bin 5; 2,253,038 in age bin 6

## STAGE 2 STUDIES

### Study Descriptions

**The Busselton Health Study (BHS)** includes a series of seven cross sectional population health surveys of adult residents of the Shire of Busselton in the South-West of Western Australia, undertaken between 1966 and 1995. A cross-sectional community follow-up study in 1994-1995 included the collection of blood for DNA extraction for all survivors of previous surveys. A total of 4,554 individuals participated in this follow-up. BP was measured in the 1994-1995 follow-up study using a standard mercury sphygmomanometer (Baumanometer, New York) as described previously<sup>18</sup>. The participants were asked to refrain from caffeine for 12 hours and to not smoke prior to attending the survey. Three BP readings were recorded on the participant's survey chart to the nearest 2 mmHg and the average of the readings was used for the analyses.

**The Cohorte Lausannoise (CoLaus)** is a population-based study aimed at assessing the prevalence and molecular determinants of cardiovascular risk factors in the population of Lausanne, Switzerland<sup>19</sup>. Participants in the study (4,969) were randomly selected from the population register of Lausanne in 2003 (N=56,694, aged 35-75 years). All individuals were of European origin, defined as having both parents and grandparents born in a defined list of European countries. Blood pressure was measured using the Omron HEM-907 machine, in the seated position. Three measures were taken on the left arm; the mean of the last two measures was used in the analyses.

**The European Prospective Investigation of Cancer (EPIC-Norfolk)** is a population-based cohort study of European men and women aged 39-79 years recruited in Norfolk, UK between 1993 and 1997<sup>20</sup>. Blood pressure was measured using the Accutorr oscillometric BP machine; the mean of two readings was taken and used in the analysis. This analysis was performed based on the subcohort sample of the EPIC-Norfolk case-cohort design (N=2,417) of which 2,411 had information on blood pressure and 2,408 had passed quality control (QC). The study design and more detailed information is available from Loos et al.<sup>21</sup>.

**The Fenland Study** is an ongoing population-based cohort study (started in 2005) designed to investigate the association between genetic and lifestyle environmental factors and the risk of obesity, insulin sensitivity, hyperglycemia, and related metabolic traits in men and women aged 30 to 55 years. Potential volunteers were recruited from general practice sampling frames in the Fenland, Ely, and Cambridge areas of the Cambridgeshire Primary Care Trust in the UK. Exclusion criteria for the study were: prevalent diabetes, pregnant and lactating women, inability to participate including terminal illness, psychotic illness, or inability to walk unaided. Currently,

the study comprises more than 3,000 participants; volunteers with complete anthropometric data were genotyped and included in the current analyses. All participants were measured at the MRC Epidemiology Unit Clinical Research Facilities in Ely, Wisbech and Cambridge. Blood pressure measurements were taken with an Accutorr automated sphygmomanometer using the average of three measurements made at one-minute intervals with the participant seated for 5 minutes prior to measurement. Of the 1,500 individuals that were genotyped 98 individuals were excluded as their genotyping data did not meet the quality control criteria applied. In total, 1,399 individuals were included in the genome-wide association analyses.

**The Kooperative Gesundheitsforschung in der Region Augsburg Third Survey (KORA S3)** is an epidemiological cohort recruited from the general population of Augsburg, Germany in 1994-1995<sup>22, 23</sup>. A subset of this survey (1,644 subjects), were genotyped using the Affymetrix 500K array (<http://epi.helmholtz-muenchen.de/kora-gen/>). In this study subjects with BMI<35 kg/m<sup>2</sup> were included; diabetics were excluded. Blood pressure was measured using a random zero sphygmomanometer in the seated position at the first examination cycle. Three measurements were taken at least three minutes apart and the numbers entering the database were the mean of the last two measurements.

**The LifeLines Cohort Study**<sup>24</sup> is a multi-disciplinary prospective population-based cohort study using a unique three-generation design to examine the health and health-related behaviors of 165,000 persons living in the North East region of The Netherlands. It employs a broad range of investigative procedures in assessing the biomedical, socio-demographic, behavioral, physical and psychological factors which contribute to the health and disease of the general population, with a special focus on multimorbidity. In addition, the LifeLines project comprises a number of cross-sectional sub-studies which investigate specific age-related conditions. These include investigations into metabolic and hormonal diseases, including obesity, cardiovascular and renal diseases, pulmonary diseases and allergy, cognitive function and depression, and musculoskeletal conditions. All survey participants are between 18 and 90 years old at the time of enrollment. Recruitment has been going on since the end of 2006, and over 130,000 participants had been included by April 2013. At the baseline examination, the participants in the study were asked to fill in a questionnaire (on paper or online) before the first visit. During the first and second visit, the first or second part of the questionnaire, respectively, are checked for completeness, a number of investigations are conducted, and blood and urine samples are taken. In the first visit to the LifeLines' study center, trained technicians measure subjects' systolic blood pressure, diastolic blood pressure, mean arterial pressure, and pulse rate, every minute for a period of 10 minutes using a DINAMAP Monitor i.e. 10 measures for each of the indices.

**The Myocardial Infarction Genetics Consortium (MIGen)** cohort is composed of a subset of the controls of a case-control study aimed at identifying genetic variants associated with early-onset myocardial infarction. Most of the controls are selected from population

based cross-sectional or cohort studies and come from five different studies: Heart Attack Risk in Puget Sound (Seattle, USA), REGICOR (Girona, Spain), MGH Premature Coronary Artery Disease Study (Boston, USA), FINRISK (Finland); Malmö Diet and Cancer Study (Malmö, Sweden). There is a minimal overlap of samples between the resources (N=30). For the majority of studies, blood pressure was measured twice using calibrated sphygmomanometers, in the seated position after at least 5 minutes of rest; the mean of the two measurements was used in the analysis. The first two principal components from an identical by state (IBS) analysis were used to adjust for potential population stratification.

**The Netherlands Study of Depression and Anxiety (NESDA)**<sup>25</sup>, is a multi-center study designed to examine the long-term course and consequences of depressive and anxiety disorders (<http://www.nesda.nl>). NESDA included both individuals with depressive and/or anxiety disorders and controls without psychiatric conditions. Inclusion criteria were age 18-65 years and self-reported western European ancestry while exclusion criteria were not being fluent in Dutch and having a primary diagnosis of another psychiatric condition (psychotic disorder, obsessive compulsive disorder, bipolar disorder, or severe substance use disorder). For all participants DNA was isolated from the baseline blood sample. Through funding from the fNIH GAIN program ([www.fnih.gov/gain](http://www.fnih.gov/gain)), whole genome scan analysis was conducted for 1859 NESDA (1702 depressed cases and 157 controls) participants. A hundred subjects were excluded because of various quality control issues<sup>26</sup>. Additional exclusions were made based on disease history, phenotype availability and medication use (e.g., all subjects using antidepressants other than SSRIs were excluded)<sup>27</sup>. Systolic blood pressure and diastolic blood pressure were measured twice using an OMRON IntelliSense Professional Digital Blood Pressure Monitor, HEM-907XL (Omron Healthcare, Inc., Bannockburn, Illinois) during supine rest on the right arm, and were averaged over the two measurements<sup>27</sup>.

**The Prevention of Renal and Vascular End Stage Disease (PREVEND)** study is an ongoing prospective study investigating the natural course of increased levels of urinary albumin excretion and its relation to renal and cardiovascular disease<sup>28; 29</sup>. Inhabitants 28 to 75 years of age (N=85,421) in the city of Groningen, The Netherlands, were asked to complete a short questionnaire, 47% responded, and individuals were then selected with a urinary albumin concentration of at least 10 mg/L (N=7,768) and a randomly selected control group with a urinary albumin concentration less than 10 mg/L (N=3,395). Details of the protocol have been described elsewhere ([www.prevent.org](http://www.prevent.org)). Blood pressure was measured in the supine position every minute for 10 and 8 minutes, respectively, with an automatic Dinamap XL Model 9300 series monitor (Critikon, Tampa, Florida). Systolic and diastolic blood pressures were calculated as the mean of the last two measurements at the two visits.

**The Precocious Coronary Artery Disease study (PROCARDIS)** ([www.procardis.org](http://www.procardis.org)) is a European consortium investigating the genetics of precocious coronary artery disease (CAD) in

German, Italian, Swedish, and British CAD patients and controls<sup>30</sup>. Country of origin was a covariate in all analyses. The CAD cases (N= 5,480) and controls (N= 1,570) were included in this study; the controls had no personal history of CAD, hypertension, or diabetes. Blood pressure was measured twice using various sphygmomanometers, in the seated position after at least 5 minutes of rest; the mean of the two measurements was used.

**The SardiNIA study** is a longitudinal study examining age-related quantitative traits in individuals from the Ogliastra region of Sardinia, Italy<sup>31</sup>. Genotype data was available for 4,305 related individuals (age >14 years). Blood pressure was measured using a mercury sphygmomanometer; the average of the second and third reading was used for the analyses. Due to the family-based nature of the SardiNIA study, this analysis allowed each family to appear in only one age bin; the selection of individuals maximized the sample size while trying to achieve 250 individuals in each age bin.

**The Study of Health In Pomerania (SHIP)** is a population-based survey in West Pomerania, the northeast area of Germany<sup>32</sup>. A sample from the adult population aged 20 to 79 years was drawn based on population registries of cities and towns in the region. SHIP finally comprised 4,308 participants (corresponding to a final response rate of 68.8%). Blood pressure was measured three times in a seated position using a digital blood pressure monitor (HEM-705CP, Omron Corporation, Tokyo, Japan). The initial reading occurred after 5 minutes of rest, with 3 minutes between sequential measurements. The mean of the second and third measurements was used in the analyses.

**The Supplementation en Vitamines et Mineraux Antioxydants study (SUVIMAX)** is a longitudinal study performed on a national sample of healthy volunteers from France between 1996 and 2001. 1,673 individuals, aged 35-65 years at baseline were included in this analysis<sup>33</sup>. Blood pressure was measured using a mercury sphygmomanometer in the seated position; the average of three readings taken from the first examination (1996) was used in the analysis.

**Tracking Adolescents' Individual Lives Survey (TRAILS)** is a prospective cohort study of Dutch adolescents with bi- or triennial measurements from age 11 to at least age 25 and consists of a general population and a clinical cohort (for a cohort profile see<sup>34</sup>). In the population cohort, four assessment waves have been completed to date, which ran from March 2001 to July 2002 (T1), September 2003 to December 2004 (T2), September 2005 to August 2007 (T3), and October 2008 to September 2010 (T4). Data for the present study were collected during the third assessment wave. At T1, 2230 (pre)adolescents were enrolled in the study (response rate 76.0%, mean age 11.09, SD 0.55, 50.8% girls<sup>35</sup>, of whom 81.4% (N = 1816, mean age 16.27, SD 0.73, 52.3% girls) participated at T3. The TRAILS Clinical Cohort runs in parallel with the TRAILS

general population cohort. The clinical cohort consists of 543 children of initially 10–12 years of age (mean age 10.89 years) who have been referred to one child psychiatric outpatient clinic in the Northern Netherlands at any point in their life. Systolic and diastolic blood pressure were measured in duplicate with a Dinamap Critikon 1846SX (Critikon Inc, Tampa, FL), from which we calculated means. Blood samples were obtained after at least 8 hours of fasting. Genome-wide genotyping was done with the Illumina Cyto SNP12 v2 array. This data was imputed using IMPUTE2 and association analysis was performed with SNPTTEST v2.2.0.

**Cardiovascular Risk in Young Finns Study (YFS)** was set up to determine the contribution of childhood lifestyle, biological, and psychological measures to the risk of cardiovascular diseases in adulthood. In 1980, over 3,500 children and adolescents from all over Finland participated in the baseline study. Thereafter these subjects were followed up with several examinations including comprehensive risk factor assessments. The 27-year follow-up was performed in 2007 and the blood pressure measurements at this time point were used for this study. Blood pressure was measured by nursing staff three times using a random-zero sphygmomanometer and the average of the three measurements was taken. Individuals were excluded if BMI, systolic or diastolic blood pressure measurements or genotype data were missing.

**Table S4: Descriptive Statistics for the Stage 2 Studies**

| Stage 2 Study | Age Bin  | N     | Median Age | Female (%) | HT (%) | BMI Mean (SD) | SBP Mean (SD) | DBP Mean (SD) | MAP Mean (SD) | PP Mean (SD) |
|---------------|----------|-------|------------|------------|--------|---------------|---------------|---------------|---------------|--------------|
| BHS           | [20,40)  | 276   | 34         | 60.1       | 2.9    | 25.0 (3.7)    | 115.6 (11.8)  | 71.6 (9.4)    | 86.3 (8.9)    | 44.0 (10.4)  |
|               | [40,50)  | 223   | 45         | 58.7       | 6.7    | 25.9 (4.1)    | 117.8 (14.4)  | 75.6 (10.4)   | 89.7 (11.2)   | 42.2 (8.8)   |
|               | [50,60)  | 225   | 55         | 51.1       | 14.7   | 26.7 (4.5)    | 125.9 (15.7)  | 79.1 (10.1)   | 94.7 (11.2)   | 46.7 (10.7)  |
|               | [60,70)  | 207   | 65         | 61.4       | 36.2   | 26.8 (4.0)    | 135.3 (17.8)  | 79.0 (9.4)    | 97.8 (10.8)   | 56.3 (14.8)  |
|               | [70,80)  | 204   | 74         | 55.4       | 50.0   | 26.2 (3.9)    | 145.3 (18.9)  | 77.8 (10.7)   | 100.3 (11.8)  | 67.5 (16.0)  |
| CoLaus        | [30,40)  | 534   | 37         | 50.4       | 2.4    | 24.9 (4.1)    | 118.5 (12.4)  | 75.6 (9.6)    | 95.7 (12.1)   | 49.0 (12.2)  |
|               | [40,50)  | 1,437 | 45         | 49.8       | 6.4    | 25.0 (4.3)    | 122.1 (15.0)  | 78.0 (10.4)   | 92.5 (11.1)   | 43.7 (8.1)   |
|               | [50,60)  | 1,334 | 55         | 55.5       | 16.4   | 26.0 (4.8)    | 130.0 (17.8)  | 81.1 (11.0)   | 96.0 (12.2)   | 49.2 (12.3)  |
|               | [60,70)  | 1,195 | 64         | 54.8       | 32.3   | 26.8 (4.6)    | 139.9 (19.6)  | 81.4 (10.6)   | 96.2 (12.3)   | 49.4 (12.3)  |
|               | [70, 80) | 443   | 73         | 56.3       | 38.7   | 26.7 (4.4)    | 145.5 (19.6)  | 78.1 (10.9)   | 95.9 (12.2)   | 49.2 (12.3)  |
| EPIC          | [40,50)  | 442   | 47         | 56.3       | 5.7    | 25.4 (4.0)    | 127.4 (14.1)  | 80.1 (10.6)   | 95.9 (11.4)   | 47.4 (6.9)   |
|               | [50,60)  | 775   | 55         | 56.3       | 10.1   | 26.1 (3.8)    | 132.5 (17.0)  | 81.9 (10.8)   | 98.8 (12.4)   | 50.5 (9.6)   |
|               | [60,70)  | 819   | 65         | 49.8       | 19.1   | 26.9 (3.7)    | 143.1 (18.4)  | 85.6 (11.1)   | 104.7 (13.0)  | 57.5 (11.1)  |
|               | [70, 80) | 371   | 72         | 50.1       | 24.3   | 26.8 (3.9)    | 147.8 (18.5)  | 86.4 (11.3)   | 106.9 (13.0)  | 61.4 (11.5)  |
| Fenland       | [30,40)  | 388   | 36         | 50.0       | 8.0    | 26.3 (4.7)    | 117.7 (13.0)  | 72.5 (9.4)    | 87.6 (9.9)    | 45.2 (8.7)   |
|               | [40,50)  | 607   | 45         | 58.2       | 16.6   | 27.4 (5.0)    | 121.9 (15.0)  | 75.5 (10.2)   | 91.0 (11.3)   | 46.4 (8.7)   |
|               | [50,60)  | 404   | 54         | 59.4       | 31.9   | 27.4 (4.8)    | 127.8 (17.7)  | 77.4 (10.9)   | 94.2 (12.6)   | 50.4 (10.5)  |
| KORA S3       | [40,50)  | 191   | 46         | 49.7       | 32.5   | 26.5 (4.5)    | 126.9 (18.7)  | 82.5 (10.8)   | 97.3 (12.8)   | 44.4 (11.5)  |
|               | [50,60)  | 984   | 55         | 51.3       | 45.0   | 27.7 (4.1)    | 134.9 (19.3)  | 84.3 (11.1)   | 101.2 (13.1)  | 50.5 (12.6)  |
|               | [60,70)  | 419   | 64         | 47.7       | 60.9   | 28.4 (3.9)    | 144.4 (20.6)  | 83.4 (11.4)   | 103.8 (13.1)  | 61.0 (15.8)  |
| LifeLines     | [20,30)  | 393   | 27         | 58.5       | 10.7   | 24.3 (3.8)    | 124.2 (12.2)  | 70.5 (6.5)    | 88.4 (7.4)    | 53.7 (10.2)  |
|               | [30,40)  | 1,576 | 36         | 57.1       | 14.2   | 25.7 (4.6)    | 123.7 (12.8)  | 72.9 (7.9)    | 89.8 (9.1)    | 50.8 (10.2)  |
|               | [40,50)  | 3,039 | 45         | 58.6       | 24.7   | 26.1 (4.4)    | 126.9 (16.2)  | 75.8 (10.0)   | 92.7 (11.6)   | 50.9 (11.1)  |
|               | [50,60)  | 1,893 | 51         | 56.0       | 37.3   | 26.7 (4.2)    | 131.2 (17.1)  | 77.8 (10.0)   | 95.5 (11.9)   | 53.5 (11.9)  |
|               | [60,70)  | 899   | 64         | 55.1       | 58.6   | 27.3 (3.9)    | 138.3 (20.8)  | 78.2 (10.1)   | 97.8 (13.9)   | 60.1 (14.8)  |
|               | [70,80)  | 288   | 72         | 54.5       | 75.3   | 27.8 (3.9)    | 145.2 (20.8)  | 78.5 (9.2)    | 100.0 (14.2)  | 65.4 (17.1)  |
| MIGen         | [30,40)  | 124   | 36         | 23.4       | 16.1   | 25.8 (4.5)    | 119.1 (14.4)  | 74.9 (9.7)    | 89.6 (10.4)   | 44.1 (10.6)  |
|               | [40,50)  | 527   | 45         | 26.9       | 20.1   | 26.7 (4.5)    | 123.9 (15.6)  | 79.7 (10.7)   | 94.4 (11.5)   | 44.3 (10.5)  |
|               | [50,60)  | 391   | 54         | 62.1       | 30.2   | 27.8 (5.4)    | 132.2 (19.8)  | 82.7 (11.9)   | 99.2 (13.6)   | 49.5 (13.6)  |
|               | [60,80)  | 154   | 64         | 29.9       | 46.1   | 28.0 (4.1)    | 141.0 (21.8)  | 82.7 (11.5)   | 102.1 (13.9)  | 58.3 (15.4)  |



|                                 |          |       |    |      |      |            |              |             |              |             |
|---------------------------------|----------|-------|----|------|------|------------|--------------|-------------|--------------|-------------|
| NESDA                           | [20,30)  | 340   | 25 | 76.5 | 0.9  | 23.6 (4.4) | 126.5 (13.0) | 74.9 (7.9)  | 92.1 (8.5)   | 51.6 (10.6) |
|                                 | [30,40)  | 361   | 35 | 72.9 | 3.3  | 25.1 (5.1) | 126.6 (13.6) | 77.6 (9.1)  | 94.0 (9.7)   | 49.1 (9.4)  |
|                                 | [40,50)  | 424   | 44 | 64.9 | 9.7  | 26.0 (5.0) | 133.4 (17.1) | 82.2 (10.5) | 99.3 (12.0)  | 51.1 (11.2) |
|                                 | [50, 60) | 422   | 54 | 61.6 | 27.0 | 26.7 (4.7) | 144.1 (21.3) | 86.4 (11.3) | 105.6 (13.8) | 57.6 (13.8) |
| PREVEND                         | [30,40)  | 853   | 34 | 55.2 | 8.3  | 24.5 (4.0) | 119.4 (14.0) | 64.4 (8.0)  | 85.4 (9.2)   | 50.9 (9.9)  |
|                                 | [40,50)  | 980   | 45 | 50.4 | 16.8 | 25.8 (4.3) | 124.4 (17.2) | 73.7 (9.9)  | 90.6 (11.9)  | 50.8 (10.4) |
|                                 | [50,60)  | 820   | 54 | 48.6 | 32.1 | 27.0 (4.2) | 133.2 (20.8) | 78.6 (10.8) | 96.7 (13.3)  | 54.5 (13.6) |
|                                 | [60,70)  | 650   | 64 | 42.0 | 52.0 | 27.5 (4.0) | 146.5 (22.4) | 82.1 (10.7) | 103.6 (13.8) | 64.1 (15.4) |
| PROCARDIS                       | [40,50)  | 649   | 47 | 20.6 | *    | 27.8 (4.9) | 131.5 (16.7) | 84.7 (10.4) | 100.3 (11.6) | 46.8 (11.7) |
|                                 | [50,60)  | 2,399 | 56 | 24.3 | *    | 28.3 (4.6) | 137.6 (18.4) | 85.3 (10.6) | 102.8 (12.2) | 52.2 (13.4) |
|                                 | [60,70)  | 3,362 | 65 | 29.3 | *    | 27.9 (4.3) | 144.3 (20.8) | 83.5 (10.8) | 103.8 (12.7) | 60.9 (16.5) |
|                                 | [70,80)  | 640   | 72 | 30.8 | *    | 27.9 (4.3) | 148.5 (22.1) | 81.8 (11.8) | 104.0 (13.7) | 66.7 (17.4) |
| SardiNIA                        | [20,40)  | 287   | 30 | 59.2 | 0.7  | 23.2 (3.6) | 117.0 (12.0) | 72.0 (8.0)  | 87.0 (9.0)   | 45.0 (10.0) |
|                                 | [40,50)  | 232   | 45 | 63.3 | 3.9  | 25.8 (4.3) | 126.0 (16.0) | 81.0 (10.0) | 96.0 (11.0)  | 45.0 (12.0) |
|                                 | [50,60)  | 268   | 54 | 49.6 | 21.6 | 28.0 (4.0) | 138.0 (19.0) | 86.0 (11.0) | 103.0 (13.0) | 53.0 (13.0) |
|                                 | [60,70)  | 257   | 64 | 49.0 | 30.0 | 28.9 (4.3) | 142.0 (17.0) | 85.0 (10.0) | 104.0 (11.0) | 57.0 (13.0) |
|                                 | [70,80)  | 204   | 74 | 51.0 | 46.1 | 28.5 (4.6) | 151.0 (20.0) | 85.0 (11.0) | 107.0 (12.0) | 66.0 (17.0) |
| SHIP                            | [20,30)  | 550   | 25 | 54.5 | 19.5 | 24.3 (4.3) | 121.9 (14.4) | 75.7 (8.4)  | 91.1 (9.6)   | 46.2 (10.4) |
|                                 | [30,40)  | 729   | 35 | 53.4 | 24.8 | 25.7 (4.3) | 125.9 (17.1) | 81.3 (10.4) | 96.2 (12.1)  | 44.5 (10.3) |
|                                 | [40,50)  | 726   | 45 | 53.2 | 38.0 | 27.7 (4.8) | 135.4 (20.8) | 87.1 (11.9) | 103.2 (14.4) | 48.3 (11.7) |
|                                 | [50,60)  | 760   | 55 | 52.5 | 44.7 | 28.4 (4.8) | 142.5 (21.3) | 88.8 (11.5) | 106.7 (14.1) | 53.8 (13.6) |
|                                 | [60,70)  | 733   | 64 | 46.1 | 53.2 | 28.8 (4.5) | 148.9 (21.3) | 87.2 (10.7) | 107.8 (13.2) | 61.7 (15.6) |
|                                 | [70,80)  | 560   | 74 | 44.5 | 58.0 | 28.5 (4.2) | 154.6 (22.4) | 85.0 (12.5) | 108.2 (14.5) | 69.6 (16.7) |
| SUVIMAX                         | [35, 50) | 819   | 46 | 74.6 | 11.6 | 22.8 (3.1) | 117.5 (11.1) | 76.0 (7.8)  | 89.8 (8.4)   | 41.5 (6.8)  |
|                                 | [50,65)  | 854   | 55 | 47.1 | 26.1 | 24.3 (3.3) | 124.4 (12.6) | 80.0 (7.9)  | 94.8 (8.9)   | 44.3 (8.0)  |
| TRAILS:<br>clinical<br>Cohort   | <20      | 266   | 16 | 30.0 | 0.0  | 21.6 (3.6) | 119.2 (12.6) | 61.0 (6.6)  | 80.4 (7.3)   | 58.2 (11.4) |
| TRAILS:<br>population<br>cohort | <20      | 1,290 | 16 | 52.0 | 0.0  | 21.3 (3.2) | 118.1 (12.4) | 61.1 (6.9)  | 80.1 (7.4)   | 57.0 (11.1) |
| YFS                             | [30,40)  | 1,562 | 36 | 53.7 | 5.4  | 25.8 (4.8) | 120.0 (13.9) | 74.7 (11.3) | 89.8 (11.5)  | 45.3 (8.9)  |
|                                 | [40,50)  | 686   | 42 | 54.2 | 13.3 | 26.4 (4.6) | 124.3 (15.7) | 78.6 (11.7) | 93.8 (12.4)  | 45.7 (9.3)  |

\* The PROCARDIS study was a case-control study of coronary artery disease; the % of cases in age bins 3 through 6 were 56.7%, 74.3%, 81.8%, and 90.6%, respectively.

**Table S5: Genotyping, Imputation, and Association Analysis Information for the Stage 2 Studies**

| Stage 2 Study | Genotyping Platform                                               | NCBI human genome reference used | Imputation Procedure                                      | Pre-Imputation QC filter information                                                                                                                                                                                                                                           | Pre-Association Filters (sample or SNP) | Association Analysis Software                                 |
|---------------|-------------------------------------------------------------------|----------------------------------|-----------------------------------------------------------|--------------------------------------------------------------------------------------------------------------------------------------------------------------------------------------------------------------------------------------------------------------------------------|-----------------------------------------|---------------------------------------------------------------|
| BHS           | Illumina 610K Chip                                                | 36                               | MACH v1.0.16.b with reference HapMap II CEU v22, Build 36 | Hardy-weinberg equilibrium(HWE) p-value: 1E-07, SNP callrate: 0.95, Sample callrate: 0.97, MAF:0.01, IBD>0.1875 removed, Ethnic outliers and gender mismatches removed                                                                                                         |                                         | Mach2qtl V1.0.8                                               |
| CoLaus        | Affymetrix 500K                                                   | 35v21                            | MACH                                                      | HWE p-values:1E-7, SNP Callrate: 0.9, MAF:0.01                                                                                                                                                                                                                                 |                                         | In house Matlab script                                        |
| EPIC          | Affymetrix 500K                                                   | 35                               | IMPUTE v0.3.1                                             | HWE p-values:1E-6, SNP Callrate: 0.9, MAF:0.01                                                                                                                                                                                                                                 |                                         | SNPTEST v1.1.5                                                |
| Fenland       | Affymetrix GeneChip Human Mapping 500K Array Set                  | 36.2                             | IMPUTE v2.1.2                                             | Sample callrate: 0.95; Heterozygosity between 27.3% and 28.8%; Duplicate Check, Relatedness Check, SNP callrate: 0.90, HWE p-value: 1E-06, MAF: 0.01                                                                                                                           |                                         | SNPTEST v1.1.5                                                |
| KORA S3       | Affymetrix 500k platform                                          | 36.1                             | MACH1 with HapMap release 22                              | MAF: 0.0008, HWE p-value: 1E-5, SNP callrate:0.9                                                                                                                                                                                                                               |                                         | ProbABEL 0.1-9e                                               |
| LifeLines     | Illumina Cyto SNP12 v2                                            | HapMap II build 36, release 24   | Beagle                                                    | SNP callrate: 0.95, MAF: 0.01, HWE p-value:1E-4, Sample callrate: 0.95, unrelatedness ( $\pi$ -hat<0.4), gender match, caucasians                                                                                                                                              | Analyze SNPs with MAF>0                 | PLINK                                                         |
| MIGen         | Affymetrix 6.0 GeneChip                                           | 35                               | MACH 1.0                                                  | SNP call rate: 0.95, sample call rate 0.95; HWE p-value:1E-6; MAF: 0.01; SNPs with CHI-MISSING $p < 1e-3$                                                                                                                                                                      |                                         | ProbABEL v0.0-6                                               |
| NESDA         | Perlegen 600k chip (N=1,747) and the Affymetrix 6.0 array (N=100) | 36 release 23                    | IMPUTE v2                                                 | SNP call rate: 0.95, MAF: 0.01, not mapped, HWE p-value: 1E-6, strand ambiguities, high concordance between genotyping platforms or between positive controls, random genotypic failure, <5% Mendelian errors, samples callrate: 0.95, unrelatedness, gender match, caucasians | None                                    | SNPTEST v2                                                    |
| PREVEND       | Illumina CytoSNP12 v2                                             | 37                               | Beagle                                                    | Sample callrate 0.95, Relatedness >0.1, Ethnic outliers Z-score > 3 for first 5 PCA, MAF: 0.01, HWE p-value: 1E-03, SNP Callrate 0.9                                                                                                                                           | plink filters on INFO <0.1, MAF <0.01   | PLINK 1.07                                                    |
| PROCARDIS     | Illumina Infinium BeadChips (1M and HumanHap                      | 36                               | MACH with reference HapMap2 release 22                    | SNP callrate: 0.955, sample callrate: 0.955, HWE p-value: 1E-6, Non-European ancestry dropped, Duplicates dropped                                                                                                                                                              | Exclude SNPs with MAF<5% and MACH       | Stata accounting for clustering in covariance due to sibships |

| Stage 2 Study | Genotyping Platform                           | NCBI human genome reference used                       | Imputation Procedure                                     | Pre-Imputation QC filter information                                                                                                                                                   | Pre-Association Filters (sample or SNP) | Association Analysis Software |
|---------------|-----------------------------------------------|--------------------------------------------------------|----------------------------------------------------------|----------------------------------------------------------------------------------------------------------------------------------------------------------------------------------------|-----------------------------------------|-------------------------------|
|               | 610)                                          |                                                        |                                                          |                                                                                                                                                                                        | $R^2 < 0.3$                             |                               |
| SardiNIA      | Combination of Affymetrix 10K, 500K, 6.0 chip | 36                                                     | MACH 1.0 with reference HapMap CEU v22                   | Sample callrate: 0.95, SNP callrate>0.90 for 10K and 500K chips, SNP callrate>0.95 for 6.0 chip, HWE p-value: 1E-06, MAF>0.05 for 10K and 500K chips, MAF>0.01 for Affymetrix 6.0 chip |                                         | MERLIN                        |
| SHIP          | Affymetrix 6.0                                | 36.1<br>36 (dbSNP 126)                                 | IMPUTE v0.5.0 with reference HapMap II CEU v22, Build 36 | Excluded arrays with call rates < 86%; Final, Duplicate samples (by IBD), gender mismatch                                                                                              |                                         | QUICKTEST v0.95               |
| SUVIMAX       | Illumina HumanHap 317                         | 35 CEU release 21                                      | IMPUTE v0.3.2                                            | Samples call rate: 0.94, SNP call rate: 0.97, HWE p-value: 1E-7                                                                                                                        |                                         | QUICKTEST                     |
| TRAILS        | Illumina Cyto SNP12 v2                        | Data were imputed using HapMap II build 36, release 22 | IMPUTE v2                                                | SNPs callrate: 0.95, MAF: 0.01, HWE p-value:1E-4, chr X >1%, heterozygous in men, samples callrate: 0.95, heterozygosity <4SD from mean, non-duplicates, gender match, caucasians      | None                                    | SNPTEST v2                    |
| YFS           | Illumina 670k custom                          | 36.3 dbSNP 126                                         | MACH 1.0 with reference HapMap II CEU v22                | HWE p-value: 1E-06, Sample callrate: 0.95, SNP callrate: 0.95, MAF: 0.01                                                                                                               |                                         | ProbABEL v. 0.1-3             |

## SINGAPORE STUDIES

### Study Descriptions

**The Singapore Chinese Eye Study (SCES)** is a population-based, cross-sectional study of Chinese adults aged 40–80+ years residing in the South-Western part of Singapore, which is part of the Singapore Epidemiology of Eye Disease (SEED). Age stratified random sampling was used to select 6,350 eligible participants, of which 3,300 participated in the study (73% response rate). Detailed methodology has been published<sup>36</sup>. Two readings of blood pressure were taken from participants after 5 minutes of rest, seated, using an automated blood pressure monitor (Dinamap Pro100V2; Criticon, Norderstedt, Germany) by trained observers. One of two cuff sizes (regular, large) was chosen on the basis of the circumference of the participant's arm. A third reading was performed if the difference between two readings of either the systolic blood pressure was greater than 10mmHg or the diastolic blood pressure was greater than 5mmHg. The mean values of the closest two readings were calculated.

**The Singapore Malay Eye Study (SiMES)** is a population-based cross-sectional epidemiological study of 3,280 individuals from one of the three major ethnic groups residing in Singapore<sup>37;38</sup>. SiMES is part of the Singapore Epidemiology of Eye Disease (SEED) study. In summary, 5600 individuals have been selected by an age-stratified sampling strategy. Among these 4168 individuals are eligible for this study. 3280 individuals finally participated in the study. All subjects were Malay and aged 40-80 years. Two readings of blood pressure were taken from participants after 5 minutes of rest, seated, using an automated blood pressure monitor (Dinamap Pro100V2; Criticon, Norderstedt, Germany) by trained observers. One of two cuff sizes (regular, large) was chosen on the basis of the circumference of the participant's arm. A third reading was performed if the difference between two readings of either the systolic blood pressure was greater than 10mmHg or the diastolic blood pressure was greater than 5mmHg. The mean values of the closest two readings were calculated.

**The Singapore Indian Eye Study (SINDI)** is a population-based, cross-sectional study of Asian Indian adults aged 40–80+ years residing in the South-Western part of Singapore, which is part of the Singapore Epidemiology of Eye Disease (SEED). Age stratified random sampling was used to select 6,350 eligible participants, of which 3,400 participated in the study (75.6% response rate). Detailed methodology has been published<sup>36</sup>. Two readings of blood pressure were taken from participants after 5 minutes of rest, seated, using an automated blood pressure monitor (Dinamap Pro100V2; Criticon, Norderstedt, Germany) by trained observers. One of two cuff sizes (regular, large) was chosen on the basis of the circumference of the participant's arm. A third reading was performed if the difference between two readings of either the systolic blood pressure was greater than 10mmHg or the diastolic blood pressure was greater than 5mmHg. The mean values of the closest two readings were calculated.

**The Singapore Prospective Study Program (SP2)** is a population-based study of diabetes and cardiovascular disease in Singapore that has been described previously<sup>39</sup>. Eligible subjects included 10,633 Chinese, Malay, and Indian subjects from four cross-sectional studies that were conducted in Singapore between 1984 and 1998.

Subjects were aged 18-69 at baseline and represented a random sample of the Singapore population. Subjects were re-visited between 2003 and 2007. Data from this re-visit were utilized for this study. Two readings of blood pressure were taken from participants after 5 min of rest, seated, using an automated blood pressure monitor (Dinamap Pro100V2; Criticon, Norderstedt, Germany) by trained observers. One of two cuff sizes (regular, large) was chosen on the basis of the circumference of the participant's arm. A third reading was performed if the difference between two readings of either the systolic blood pressure was greater than 10mmHg or the diastolic blood pressure was greater than 5mmHg. The mean values of the closest two readings were calculated.

**Table S6: Descriptive Statistics for the Singapore Studies**

| <b>Singapore Study</b>        | <b>Age Bin</b> | <b>N</b> | <b>Median Age</b> | <b>Female (%)</b> | <b>HT (%)</b> | <b>BMI Mean (SD)</b> | <b>SBP Mean (SD)</b> | <b>DBP Mean (SD)</b> | <b>MAP Mean (SD)</b> | <b>PP Mean (SD)</b> |
|-------------------------------|----------------|----------|-------------------|-------------------|---------------|----------------------|----------------------|----------------------|----------------------|---------------------|
| SCES                          | [40,50)        | 470      | 47                | 49.8              | 14.7          | 23.8 (3.7)           | 130.1 (17.5)         | 79.4 (10.8)          | 96.3 (12.3)          | 50.7 (11.6)         |
|                               | [50,60)        | 633      | 55                | 52.3              | 26.7          | 23.8 (3.4)           | 137.1 (18.6)         | 80.8 (10.1)          | 99.6 (12.0)          | 56.3 (13.4)         |
|                               | [60,70)        | 497      | 63                | 46.9              | 46.7          | 23.7 (3.4)           | 146.9 (18.6)         | 81.7 (9.4)           | 103.4 (11.2)         | 65.2 (14.7)         |
|                               | [70,80)        | 249      | 73                | 39.8              | 59.8          | 23.8 (3.5)           | 155.9 (19.3)         | 80.5 (8.1)           | 105.6 (10.3)         | 75.4 (16.6)         |
| SiMES                         | [40,50)        | 590      | 45                | 52.2              | 41.4          | 26.4 (5.4)           | 134.9 (19.8)         | 79.7 (11.2)          | 98.1 (13.3)          | 55.2 (13.2)         |
|                               | [50,60)        | 750      | 54                | 55.1              | 65.5          | 27.1 (4.9)           | 147.2 (22.8)         | 82.4 (11.6)          | 104.0 (14.2)         | 64.8 (16.6)         |
|                               | [60,70)        | 599      | 65                | 50.1              | 84.0          | 26.7 (5.0)           | 156.9 (23.8)         | 81.7 (11.3)          | 106.7 (14.2)         | 75.3 (18.0)         |
|                               | [70,80)        | 563      | 74                | 43.3              | 89.9          | 25.1 (5.0)           | 162.3 (23.8)         | 81.0 (11.5)          | 108.1 (14.5)         | 81.3 (17.4)         |
| SINDI                         | [40,50)        | 632      | 46                | 51.7              | 23.3          | 26.2 (4.6)           | 127.9 (18.6)         | 78.6 (11.0)          | 95.1 (12.7)          | 49.3 (12.3)         |
|                               | [50,60)        | 799      | 54                | 50.3              | 36.1          | 27.0 (4.8)           | 135.9 (19.3)         | 80.2 (10.7)          | 98.8 (12.6)          | 55.6 (13.7)         |
|                               | [60,70)        | 723      | 63                | 46.2              | 48.6          | 25.8 (4.7)           | 146.1 (20.6)         | 79.9 (10.0)          | 102.0 (12.2)         | 66.2 (16.2)         |
|                               | [70,80)        | 322      | 73                | 47.5              | 60.3          | 25.6 (5.0)           | 152.1 (19.9)         | 77.0 (8.6)           | 102.0 (11.0)         | 75.1 (16.6)         |
| SP2<br>(Illumina 1M platform) | [30,40)        | 205      | 36                | 42.9              | 7.3           | 22.4 (3.5)           | 120.1 (14.1)         | 73.3 (9.4)           | 88.9 (10.4)          | 46.8 (8.7)          |
|                               | [40,50)        | 405      | 45                | 39.8              | 11.9          | 22.9 (3.4)           | 126.1 (14.6)         | 78.0 (10.6)          | 94.0 (11.3)          | 48.0 (9.1)          |
|                               | [50,60)        | 203      | 54                | 28.6              | 23.2          | 23.6 (3.6)           | 134.7 (18.2)         | 82.3 (11.3)          | 99.8 (12.8)          | 52.4 (12.0)         |
| SP2 (Illumina 610 platform)   | [30,40)        | 201      | 35                | 75.1              | 4.0           | 22.2 (4.7)           | 115.7 (13.1)         | 70.8 (8.2)           | 85.8 (9.2)           | 44.9 (8.7)          |
|                               | [40,50)        | 366      | 45                | 80.6              | 11.2          | 22.5 (3.7)           | 122.4 (16.4)         | 73.8 (9.9)           | 90.0 (11.4)          | 48.6 (10.7)         |
|                               | [50,60)        | 337      | 54                | 78.0              | 23.7          | 23.1 (3.7)           | 132.1 (18.3)         | 77.0 (10.9)          | 95.3 (12.3)          | 55.2 (13.2)         |
|                               | [60,70)        | 138      | 65                | 73.2              | 37.7          | 23.4 (3.2)           | 150.0 (20.2)         | 78.4 (9.2)           | 102.3 (11.6)         | 71.6 (16.1)         |

**Table S7: Genotyping, Imputation, and Association Analysis Information for the Singapore Studies**

| Singapore Study | Genotyping Platform          | NCBI human genome reference used | Imputation Procedure                                | Pre-Imputation QC filter information                                                                                                                                              | Pre-Association Filters (sample or SNP) | Association Analysis Software               |
|-----------------|------------------------------|----------------------------------|-----------------------------------------------------|-----------------------------------------------------------------------------------------------------------------------------------------------------------------------------------|-----------------------------------------|---------------------------------------------|
| SCES            | Illumina610 Quad             | Build 36/hg18                    | IMPUTE2.2, HapMap phase2 release22 JPT+CHB          | Sample callrate: 0.95, SNP callrate>0.95, HWE p-value: 1E-06, MAF>0; Sample call rate >0.95, population outlier, cryptic relationship, excessive heterozygosity, gender mismatch. | None                                    | SNPTEST v2.2                                |
| SiMES           | Illumina610 Quad             | Build 36/hg18                    | IMPUTE0.5, HapMap phase2 release22 JPT+CHB+CEU+Y RI | Sample callrate: 0.95, SNP callrate>0.95, HWE p-value: 1E-06, MAF>0; Sample call rate >0.95, population outlier, cryptic relationship, excessive heterozygosity, gender mismatch. | None                                    | SNPTEST v2.2<br>Covariates PC1 and PC2      |
| SINDI           | Illumina610 Quad             | Build 36/hg18                    | IMPUTE0.5, HapMap phase2 release22 JPT+CHB+CEU+Y RI | Sample callrate: 0.95, SNP callrate>0.95, HWE p-value: 1E-06, MAF>0; Sample call rate >0.95, population outlier, cryptic relationship, excessive heterozygosity, gender mismatch. | None                                    | SNPTEST v2.2<br>Covariates PC1, PC2 and PC3 |
| SP2             | Illumina 1M and Illumina 610 | Build 36/hg18                    | IMPUTE0.5, HapMap phase2 release22 JPT+CHB          | Sample callrate: 0.95, SNP callrate>0.95, HWE p-value: 1E-06, MAF>0; Sample call rate >0.95, population outlier, cryptic relationship, excessive heterozygosity, gender mismatch. | None                                    | SNPTEST v2.2                                |

## TITLES OF SUPPLEMENTAL TABLES 8-22

**NOTE: Red text denotes a table with results from all stages of analysis.**

**Table S8:** Joint Effects of the SNP and SNP-age Interaction on Systolic Blood Pressure from the Meta-regression Using Stage 1 Subgroups (CHARGE)

**Table S9:** Joint Effects of the SNP and SNP-age Interaction on Diastolic Blood Pressure from the Meta-regression Using Stage 1 Subgroups (CHARGE)

**Table S10:** Joint Effects of the SNP and SNP-age Interaction on Mean Arterial Pressure from the Meta-regression Using Stage 1 Subgroups (CHARGE)

**Table S11:** Joint Effects of the SNP and SNP-age Interaction on Pulse Pressure from the Meta-regression Using Stage 1 Subgroups (CHARGE)

**Table S12:** Combined Meta-regression of all Stage 1 (CHARGE) and Stage 2 (largely Global BPgen) Subgroups for Loci with Suggestive or Significant Evidence by the Joint 2 DF test; Replication in the Singapore Subgroups

**Table S13:** Five Loci Identified With the Joint 2DF Test That Would Have Been Missed By a Two-Stage Main Effects Only Analysis

**Table S14:** One Degree of Freedom Test of SNP-age Interactions on Mean Arterial Pressure in Stage 1 Subgroups (CHARGE)

**Table S15:** One Degree of Freedom Test of SNP-age Interactions on Pulse Pressure in Stage 1 Subgroups (CHARGE)

**Table S16:** Replication of Loci Chosen Through the 1DF Test of the SNP-age Interaction; Combined Meta-regression of All Stage 1 and Stage 2 Subgroups (Individuals of European Ancestry)

**Table S17:** Genomic Inflation Factors from the Inverse-variance Weighted Meta-Analysis Conducted Within Each Age Bin; the Secondary Analysis Using Stage 1 Subgroups (CHARGE)

**Table S18:** Within Age Bin Meta-analysis of the SNP Effect on Systolic Blood Pressure: Significant and Suggestive Associations in the Secondary Analysis of Stage 1 (CHARGE)

**Table S19:** Within Age Bin Meta-analysis of the SNP Effect on Diastolic Blood Pressure: Significant and Suggestive Associations in the Secondary Analysis of Stage 1 (CHARGE)

**Table S20:** Within Age Bin Meta-analysis of the SNP Effect on Mean Arterial Pressure: Significant and Suggestive Associations in the Secondary Analysis of Stage 1 (CHARGE)

**Table S21:** Within Age Bin Meta-analysis of the SNP Effect on Pulse Pressure: Significant and Suggestive Associations in the Secondary Analysis of Stage 1 (CHARGE)



**Table S22:** Combined Within-Age Bin Meta-analysis of Stage 1 and Stage 2 Subgroups; Replication of Secondary Within-Age Bin Analyses Using Singapore Subgroups.

## ACKNOWLEDGMENTS

**AGES** has been funded by NIH contract N01-AG-12100, the NIA Intramural Research Program Z01-AG-007380, Hjartavernd (the Icelandic Heart Association), and the Althingi (the Icelandic Parliament). The study is approved by the Icelandic National Bioethics Committee, VSN: 00-063.

**ARIC** is carried out as a collaborative study supported by National Heart, Lung, and Blood Institute contracts N01-HC-55015, N01-HC-55016, N01-HC-55018, N01-HC-55019, N01-HC-55020, N01-HC-55021, N01-HC-55022 and R01HL087641; National Human Genome Research Institute contract U01HG004402; and National Institutes of Health contract HHSN268200625226C. The authors thank the staff and participants of the ARIC study for their important contributions. Infrastructure was partly supported by Grant Number UL1RR025005, a component of the National Institutes of Health and NIH Roadmap for Medical Research. The meta-analysis and meta-regression analyses were funded by grant R01 HL086694 from the National Heart, Lung, and Blood Institute.

**BHS:** The Busselton Health Study acknowledges the generous support for the 1994/5 follow-up study from Healthway, Western Australia and the numerous Busselton community volunteers who assisted with data collection and the study participants from the Shire of Busselton. The Busselton Health Study is supported by The Great Wine Estates of the Margaret River region of Western Australia. The study gratefully acknowledges the assistance of the Western Australian DNA Bank (NHMRC Enabling Facility) with DNA samples and the support provided by the Ark (NHMRC Enabling Facility) for this study.

**CARDIA:** The Coronary Artery Risk Development in Young Adults (CARDIA) study is funded by contracts N01-HC-95095, N01-HC-48047, N01-HC-48048, N01-HC-48049, N01-HC-48050, N01-HC-45134, N01-HC-05187, N01-HC-45205, and N01-HC-45204 from the National Heart, Lung and Blood Institute to the CARDIA investigators. A full list of principal CARDIA investigators and institutions can be found at <http://www.cardia.dopm.uab.edu/study-information/participating-institutions>. Genotyping and data analyses was funded as part of the Gene Environment Association Studies (GENEVA) under GEI through grant U01-HG004729 from the National Human Genome Research Institute to MF. Funding support for genotyping, which was performed at the Broad Institute of MIT and Harvard, was provided by U01-HG04424. Assistance with genotype cleaning, as well as with general study coordination, was provided by the GENEVA Coordinating Center (U01-HG004446). The authors thank the investigators and staff of the GENEVA coordinating center and the Broad Institute genotyping center, as well as the staff and participants of the CARDIA study for their important contributions.

**CHS:** This CHS research was supported by NHLBI contracts HHSN268201200036C, HHSN268200800007C, N01HC55222, N01HC85079, N01HC85080, N01HC85081, N01HC85082, N01HC85083, N01HC85086; and NHLBI grants HL080295, HL087652, HL105756 with additional contribution from the National Institute of Neurological Disorders and Stroke (NINDS). Additional support was provided through AG023629 from the National Institute on Aging (NIA). A full list of CHS investigators and institutions can be found at <http://www.chs-nhlbi.org>. DNA handling and genotyping at Cedars-Sinai Medical Center was supported in part by the National Center for Research Resources, grant UL1RR033176, and is now at the National Center for

Advancing Translational Sciences, CTSI grant UL1TR000124; in addition to the National Institute of Diabetes and Digestive and Kidney Disease grant DK063491 to the Southern California Diabetes Endocrinology Research Center.

**CoLaus:** The CoLaus authors thank Yolande Barreau, Mathieu Firmann, Vladimir Mayor, Anne-Lise Bastian, Binasa Ramic, Martine Moranville, Martine Baumer, Marcy Sagette, Jeanne Ecoffey, and Sylvie Mermoud for data collection. The CoLaus study received financial contributions from GlaxoSmithKline, the Faculty of Biology and Medicine of Lausanne, the Swiss National Science Foundation (33CSO-122661, 3200BO-111361/2, 3100AO-116323/1, 310000-112552), the Swiss School of Public Health Plus, the Giorgi-Cavaglieri Foundation, the European Framework Project 6 (EuroDia, AnEuploidy and Hypergenes projects).

**EPIC-Norfolk:** The EPIC Norfolk study is supported by programme grants from the Medical Research Council, and Cancer Research UK. We acknowledge the contribution of the staff and participants of the EPIC-Norfolk Study.

**Fenland:** The Fenland Study is funded by the Medical Research Council (MC\_U106179471). We are grateful to all the volunteers for their time and help, and to the General Practitioners and practice staff for assistance with recruitment. We thank the Fenland Study Investigators, Fenland Study Co-ordination team and the Epidemiology Field, Data and Laboratory teams.

**FHS:** From the Framingham Heart Study of the National Heart Lung and Blood Institute of the National Institutes of Health and Boston University School of Medicine. This work was supported by the National Heart, Lung and Blood Institute's Framingham Heart Study (Contract No. N01-HC-25195) and its contract with Affymetrix, Inc for genotyping services (Contract No. N02-HL-6-4278), and by grants from the National Institute of Neurological Disorders and Stroke (NS17950; PAW) and the National Institute of Aging, (AG08122, AG16495; PAW). Analyses reflect intellectual input and resource development from the Framingham Heart Study investigators participating in the SNP Health Association Resource (SHARe) project.

**KORA S3:** KORA S3 500K blood pressure project was supported by Estonian Ministry of Education and Science core grant no SF0180022s12 (to M.L). The KORA Augsburg studies have been financed by the Helmholtz Zentrum München, German Research Center for Environmental Health, Neuherberg, Germany and supported by grants from the German Federal Ministry of Education and Research (BMBF). The KORA study group consists of H-E. Wichmann (speaker), A. Peters, C. Meisinger, T. Illig, R. Holle, J. John and co-workers who are responsible for the design and conduct of the KORA studies. Part of this work was financed by the German National Genome Research Network (NGFN-2 and NGFNPlus:01GS0823) and supported within the Munich Center of Health Sciences (MC Health) as part of LMUinnovativ.

**LifeLines:** The LifeLines Cohort Study, and generation and management of GWAS genotype data for the LifeLines Cohort Study is supported by the Netherlands Organization of Scientific Research NWO (grant 175.010.2007.006), the Economic Structure Enhancing Fund (FES) of the Dutch government, the Ministry of Economic Affairs, the Ministry of Education, Culture and Science, the Ministry for Health, Welfare and Sports, the Northern Netherlands Collaboration of Provinces (SNN), the Province of Groningen, University Medical Center Groningen, the University of Groningen, Dutch Kidney Foundation and Dutch Diabetes Research Foundation. We thank Behrooz Alizadeh, Annemieke Boesjes, Marcel Bruinenberg, Noortje Festen, Pim van der Harst, Ilja Nolte, Lude Franke, Mitra Valimohammadi for their help in creating the GWAS database, and Rob Bieringa, Joost Keers, René Oostergo, Rosalie Visser, Judith Vonk for their work related to data-collection and validation. The authors are grateful to the study participants, the staff from the LifeLines Cohort Study and Medical Biobank Northern Netherlands, and the participating general practitioners and pharmacists.

**MESA:** MESA and the MESA SHARe project are conducted and supported by the National Heart, Lung, and Blood Institute (NHLBI) in collaboration with MESA investigators. Support for MESA is provided by contracts N01-HC-95159, N01-HC-95160, N01-HC-95161, N01-HC-95162, N01-HC-95163, N01-HC-95164, N01-HC-95165, N01-HC-95166, N01-HC-95167, N01-HC-95168, N01-HC-95169, and CTSA UL1-RR-024156.

**MIGen:** The Myocardial Infarction Genetics Consortium (MIGen) was funded by grant R01 HL087676 (NIH, USA). This work was supported by the European Regional Development Fund (ERDF-FEDER), the Spanish Ministry of Economy and Innovation through the Carlos III Health Institute [CIBER Epidemiología y Salud Pública, Red de Investigación Cardiovascular, Heracles Program RD12/0042, PI09/90506], the Catalan Research and Technology Innovation Interdepartmental Commission [SGR 1195] and Fundació La Marató de TV3 [81810]. GL was funded by the Juan de la Cierva Program, Ministerio de Educación (JCI-2009-04684). Study Concept and Design: David Altshuler, Sekar Kathiresan, Diego Ardissino, Pier M Mannucci, David S Siscovick, Christopher J O'Donnell, Leena Peltonen, Veikko Salomaa, Stephen M Schwartz, Olle Melander; Phenotype Data Acquisition/QC: Stephen M Schwartz Genotype Data Acquisition/QC: Benjamin F Voight, Shaun Purcell;

**NESDA:** The infrastructure for the NESDA study is funded through the Geestkracht programme of the Dutch Scientific Organization (ZON-MW, grant number 10-000-1002) and matching funds from participating universities and mental health care organizations. Genotyping in NESDA was funded by the Genetic Association Information Network (GAIN) of the Foundation for the US National Institutes of Health. Statistical analyses were carried out on the Genetic Cluster Computer (<http://www.geneticcluster.org>), which is financially supported by the Netherlands Scientific Organization (NWO 480-05-003) along with a supplement from the Dutch Brain Foundation.

**PREVEND:** PREVEND genetics is supported by the Dutch Kidney Foundation (Grant E033), the EU project grant GENECURE (FP-6 LSHM CT 2006 037697), the National Institutes of Health (grant LM010098), The Netherlands organisation for health research and development (NWO VENI grant 916.761.70 & ZonMw grant 90.700.441), and the Dutch Inter University Cardiology Institute Netherlands (ICIN).

**PROCARDIS** was supported by the European Community Sixth Framework Program (LSHM-CT-2007-037273), AstraZeneca, the British Heart Foundation, the Swedish Research Council, the Knut and Alice Wallenberg Foundation, the Swedish Heart-Lung Foundation, the Torsten and Ragnar Söderberg Foundation, the Strategic Cardiovascular Program of Karolinska Institutet and Stockholm County Council, the Foundation for Strategic Research and the Stockholm County Council (560283). MF and HW acknowledge support from the Oxford British Heart Foundation Centre of Research Excellence and a Wellcome Trust core award (075491/Z/04).

**RS I and RS II:** The GWA database of the Rotterdam Study was funded through the Netherlands Organisation of Scientific Research NWO (nr. 175.010.2005.011). The Rotterdam Study is supported by the Erasmus Medical Center and Erasmus University, Rotterdam; the Netherlands Organization for Scientific Research (NWO), the Netherlands Organization for Health Research and Development (ZonMw), the Research Institute for Diseases in the Elderly (RIDE), the Ministry of Education, Culture and Science, the Ministry for Health, Welfare and Sports, the European Commission (DG XII), and the Municipality of Rotterdam.

**SardiNIA:** The work was supported by the National Institute on Aging, Intramural Research Program.

**SCES, SiMES, SINDI and SP2:** SCES, SiMES, SINDI, and SP2 acknowledge the support of the Yong Loo Lin School of Medicine, the National University Health System and the Life Sciences Institute from the National University of Singapore. The National Medical Research Council provided support through the

individual research grant, the clinician scientist award and Singapore translational investigator award schemes. The Biomedical research council in Singapore also provided support through the individual research grant scheme. We also acknowledge the support from the National Research Foundation of Singapore (NRF-RF-2010-05).

**SHIP:** SHIP was funded by grants from the German Federal Ministry of Education and Research (BMBF, Grants 01ZZ0403, 01ZZ0103, 01GI0883), the Ministry for Education, Research and Cultural Affairs as well as the Ministry of Social Affairs of the Federal State of Mecklenburg-West Pomerania. Genome-wide data have been supported by the Federal Ministry of Education and Research (grant no. 03ZIK012) and a joint grant from Siemens Healthcare, Erlangen, Germany and the Federal State of Mecklenburg- West Pomerania. The University of Greifswald is a member of the ‘Center of Knowledge Interchange’ program of the Siemens AG.

**SUVIMAX:** We thank the Commissariat à l’Energie Atomique, the Université Paris 13, the Conservatoire National des Arts et Métiers, the Institut National de la Recherche Agronomique and the Institut National de la Santé et de la Recherche Médicale for their financial support.

**TRAILS** (TRacking Adolescents’ Individual Lives Survey) is a collaborative project involving various departments of the University Medical Center and University of Groningen, the Erasmus University Medical Center Rotterdam, the University of Utrecht, the Radboud Medical Center Nijmegen, and the Parnassia Bavo group, all in the Netherlands. TRAILS has been financially supported by grants from the Netherlands Organization for Scientific Research NWO (Medical Research Council program grant GB-MW 940-38-011; ZonMW Brainpower grant 100-001-004; ZonMw Risk Behavior and Dependence grants 60-60600-98-018 and 60-60600-97-118; ZonMw Culture and Health grant 261-98-710; Social Sciences Council medium-sized investment grants GB-MaGW 480-01-006 and GB-MaGW 480-07-001; Social Sciences Council project grants GB-MaGW 457-03-018, GB-MaGW 452-04-314, and GB-MaGW 452-06-004; NWO large-sized investment grant 175.010.2003.005; NWO Longitudinal Survey and Panel Funding 481-08-013); the Sophia Foundation for Medical Research (projects 301 and 393), the Dutch Ministry of Justice (WODC), the European Science Foundation (EuroSTRESS project FP-006), and the participating universities. We are grateful to all adolescents, their parents and teachers who participated in this research and to everyone who worked on this project and made it possible. Statistical analyses were carried out on the Genetic Cluster Computer (<http://www.geneticcluster.org>), which is financially supported by the Netherlands Scientific Organization (NWO 480-05-003) along with a supplement from the Dutch Brain Foundation.

**WGHS:** The WGHS is funded by the Donald W. Reynolds Foundation (Las Vegas, NV), the Fondation LeDucq (Paris, France), the National Heart, Lung and Blood Institute (NHLBI; HL043851) and the National Cancer Institute (NCI; CA047988). Funding for genotyping and collaborative scientific support was provided by Amgen.

**YFS:** The Young Finns Study has been financially supported by the Academy of Finland: grants 134309 (Eye), 126925, 121584, 124282, 129378 (Salve), 117787 (Gendi), and 41071 (Skidi), the Social Insurance Institution of Finland, Kuopio, Tampere and Turku University Hospital Medical Funds (grant 9M048 and 9N035 for TeLeht), Juho Vainio Foundation, Paavo Nurmi Foundation, Finnish Foundation of Cardiovascular Research and Finnish Cultural Foundation, Tampere Tuberculosis Foundation and Emil Aaltonen Foundation (T.L). The expert technical assistance in the statistical analyses by Ville Aalto and Irina Lisinen is gratefully acknowledged.

## LIFELINES BANNER AUTHORSHIP

LifeLines Cohort Study: Behrooz Z Alizadeh (1), Rudolf A de Boer (2), H Marike Boezen (1), Marcel Bruinenberg (3), Lude Franke (4), Pim van der Harst (2), Hans L Hillege (1,2), Melanie M van der Klauw (5), Gerjan Navis (6), Johan Ormel (7), Dirkje S Postma (8), Judith GM Rosmalen (7), Joris P Slaets (9), Harold Snieder (1), Ronald P Stolk (1), Bruce HR Wolffenbuttel (5), Cisca Wijmenga (4)

- (1) University of Groningen, University Medical Center Groningen, Department of Epidemiology, Groningen, The Netherlands
- (2) University of Groningen, University Medical Center Groningen, Department of Cardiology, Groningen, The Netherlands
- (3) University of Groningen, University Medical Center Groningen, LifeLines Cohort Study, Groningen, The Netherlands
- (4) University of Groningen, University Medical Center Groningen, Department of Genetics, Groningen, The Netherlands
- (5) University of Groningen, University Medical Center Groningen, Department of Endocrinology, Groningen, The Netherlands
- (6) University of Groningen, University Medical Center Groningen, Department of Internal Medicine, Division of Nephrology, Groningen, The Netherlands
- (7) University of Groningen, University Medical Center Groningen, Interdisciplinary Center of Psychopathology of Emotion Regulation (ICPE), Department of Psychiatry, Groningen, The Netherlands
- (8) University of Groningen, University Medical Center Groningen, Department of Pulmonology, Groningen, The Netherlands
- (9) University of Groningen, University Medical Center Groningen, University Center for Geriatric Medicine, Groningen, The Netherlands

## REFERENCES

1. Harris, T.B., Launer, L.J., Eiriksdottir, G., Kjartansson, O., Jonsson, P.V., Sigurdsson, G., Thorgeirsson, G., Aspelund, T., Garcia, M.E., Cotch, M.F., et al. (2007). Age, Gene/Environment Susceptibility-Reykjavik Study: multidisciplinary applied phenomics. *Am J Epidemiol* 165, 1076-1087.
2. Rose, G.A., and Blackburn, H. (1966). *Cardiovascular population studies: Methods*. (World Health Organization, Geneva).
3. The ARIC investigators. (1989). The Atherosclerosis Risk in Communities (ARIC) Study: design and objectives. *Am J Epidemiol* 129, 687-702.
4. Friedman, G.D., Cutter, G.R., Donahue, R.P., Hughes, G.H., Hulley, S.B., Jacobs, D.R., Jr., Liu, K., and Savage, P.J. (1988). CARDIA: study design, recruitment, and some characteristics of the examined subjects. *J Clin Epidemiol* 41, 1105-1116.
5. Fried, L.P., Borhani, N.O., Enright, P., Furberg, C.D., Gardin, J.M., Kronmal, R.A., Kuller, L.H., Manolio, T.A., Mittelmark, M.B., Newman, A., et al. (1991). The Cardiovascular Health Study: design and rationale. *Ann Epidemiol* 1, 263-276.
6. Dawber, T.R., Meadors, G.F., and Moore, F.E., Jr. (1951). Epidemiological approaches to heart disease: the Framingham Study. *Am J Public Health Nations Health* 41, 279-281.
7. Feinleib, M., Kannel, W.B., Garrison, R.J., McNamara, P.M., and Castelli, W.P. (1975). The Framingham Offspring Study. Design and preliminary data. *Prev Med* 4, 518-525.
8. Splansky, G.L., Corey, D., Yang, Q., Atwood, L.D., Cupples, L.A., Benjamin, E.J., D'Agostino, R.B., Sr., Fox, C.S., Larson, M.G., Murabito, J.M., et al. (2007). The Third Generation Cohort of the National Heart, Lung, and Blood Institute's Framingham Heart Study: design, recruitment, and initial examination. *Am J Epidemiol* 165, 1328-1335.
9. Kramer, H., Han, C., Post, W., Goff, D., Diez-Roux, A., Cooper, R., Jinagouda, S., and Shea, S. (2004). Racial/ethnic differences in hypertension and hypertension treatment and control in the multi-ethnic study of atherosclerosis (MESA). *Am J Hypertens* 17, 963-970.
10. Bild, D.E., Bluemke, D.A., Burke, G.L., Detrano, R., Diez Roux, A.V., Folsom, A.R., Greenland, P., Jacob, D.R., Jr., Kronmal, R., Liu, K., et al. (2002). Multi-ethnic study of atherosclerosis: objectives and design. *Am J Epidemiol* 156, 871-881.
11. Hofman, A., Breteler, M.M., van Duijn, C.M., Krestin, G.P., Pols, H.A., Stricker, B.H., Tiemeier, H., Uitterlinden, A.G., Vingerling, J.R., and Witteman, J.C. (2007). The Rotterdam Study: objectives and design update. *Eur J Epidemiol* 22, 819-829.
12. Hofman, A., Breteler, M.M., van Duijn, C.M., Janssen, H.L., Krestin, G.P., Kuipers, E.J., Stricker, B.H., Tiemeier, H., Uitterlinden, A.G., Vingerling, J.R., et al. (2009). The Rotterdam Study: 2010 objectives and design update. *Eur J Epidemiol* 24, 553-572.
13. Hofman, A., van Duijn, C.M., Franco, O.H., Ikram, M.A., Janssen, H.L., Klaver, C.C., Kuipers, E.J., Nijsten, T.E., Stricker, B.H., Tiemeier, H., et al. (2011). The Rotterdam Study: 2012 objectives and design update. *Eur J Epidemiol* 26, 657-686.
14. Ridker, P.M., Chasman, D.I., Zee, R.Y., Parker, A., Rose, L., Cook, N.R., and Buring, J.E. (2008). Rationale, design, and methodology of the Women's Genome Health Study: a genome-wide association study of more than 25,000 initially healthy american women. *Clin Chem* 54, 249-255.
15. Lewington, S., Clarke, R., Qizilbash, N., Peto, R., and Collins, R. (2002). Age-specific relevance of usual blood pressure to vascular mortality: a meta-analysis of individual data for one million adults in 61 prospective studies. *Lancet* 360, 1903-1913.

16. Colditz, G.A., Martin, P., Stampfer, M.J., Willett, W.C., Sampson, L., Rosner, B., Hennekens, C.H., and Speizer, F.E. (1986). Validation of questionnaire information on risk factors and disease outcomes in a prospective cohort study of women. *Am J Epidemiol* 123, 894-900.
17. Conen, D., Ridker, P.M., Buring, J.E., and Glynn, R.J. (2007). Risk of cardiovascular events among women with high normal blood pressure or blood pressure progression: prospective cohort study. *BMJ* 335, 432.
18. Adams, C., Burke, V., and Beilin, L.J. (2002). Accuracy of blood pressure measurement and anthropometry among volunteer observers in a large community survey. *J Clin Epidemiol* 55, 338-344.
19. Firmann, M., Mayor, V., Vidal, P.M., Bochud, M., Pecoud, A., Hayoz, D., Paccaud, F., Preisig, M., Song, K.S., Yuan, X., et al. (2008). The CoLaus study: a population-based study to investigate the epidemiology and genetic determinants of cardiovascular risk factors and metabolic syndrome. *BMC Cardiovasc Disord* 8, 6.
20. Day, N., Oakes, S., Luben, R., Khaw, K.T., Bingham, S., Welch, A., and Wareham, N. (1999). EPIC-Norfolk: study design and characteristics of the cohort. *European Prospective Investigation of Cancer. Br J Cancer* 80 Suppl 1, 95-103.
21. Loos, R.J., Lindgren, C.M., Li, S., Wheeler, E., Zhao, J.H., Prokopenko, I., Inouye, M., Freathy, R.M., Attwood, A.P., Beckmann, J.S., et al. (2008). Common variants near MC4R are associated with fat mass, weight and risk of obesity. *Nat Genet* 40, 768-775.
22. Heid, I.M., Vollmert, C., Hinney, A., Doring, A., Geller, F., Lowel, H., Wichmann, H.E., Illig, T., Hebebrand, J., and Kronenberg, F. (2005). Association of the 103I MC4R allele with decreased body mass in 7937 participants of two population based surveys. *J Med Genet* 42, e21.
23. Wichmann, H.E., Gieger, C., and Illig, T. (2005). KORA-gen--resource for population genetics, controls and a broad spectrum of disease phenotypes. *Gesundheitswesen* 67 Suppl 1, S26-30.
24. Stolk, R.P., Rosmalen, J.G., Postma, D.S., de Boer, R.A., Navis, G., Slaets, J.P., Ormel, J., and Wolffenbuttel, B.H. (2008). Universal risk factors for multifactorial diseases: LifeLines: a three-generation population-based study. *Eur J Epidemiol* 23, 67-74.
25. Penninx, B.W., Beekman, A.T., Smit, J.H., Zitman, F.G., Nolen, W.A., Spinhoven, P., Cuijpers, P., De Jong, P.J., Van Marwijk, H.W., Assendelft, W.J., et al. (2008). The Netherlands Study of Depression and Anxiety (NESDA): rationale, objectives and methods. *Int J Methods Psychiatr Res* 17, 121-140.
26. Sullivan, P.F., de Geus, E.J., Willemsen, G., James, M.R., Smit, J.H., Zandbelt, T., Arolt, V., Baune, B.T., Blackwood, D., Cichon, S., et al. (2009). Genome-wide association for major depressive disorder: a possible role for the presynaptic protein piccolo. *Mol Psychiatry* 14, 359-375.
27. Licht, C.M., de Geus, E.J., Seldenrijk, A., van Hout, H.P., Zitman, F.G., van Dyck, R., and Penninx, B.W. (2009). Depression is associated with decreased blood pressure, but antidepressant use increases the risk for hypertension. *Hypertension* 53, 631-638.
28. Pinto-Sietsma, S.J., Janssen, W.M., Hillege, H.L., Navis, G., De Zeeuw, D., and De Jong, P.E. (2000). Urinary albumin excretion is associated with renal functional abnormalities in a nondiabetic population. *J Am Soc Nephrol* 11, 1882-1888.
29. Hillege, H.L., Fidler, V., Diercks, G.F., van Gilst, W.H., de Zeeuw, D., van Veldhuisen, D.J., Gans, R.O., Janssen, W.M., Grobbee, D.E., and de Jong, P.E. (2002). Urinary albumin excretion predicts cardiovascular and noncardiovascular mortality in general population. *Circulation* 106, 1777-1782.
30. Broadbent, H.M., Peden, J.F., Lorkowski, S., Goel, A., Ongen, H., Green, F., Clarke, R., Collins, R., Franzosi, M.G., Tognoni, G., et al. (2008). Susceptibility to coronary artery disease and diabetes is encoded by distinct, tightly linked SNPs in the ANRIL locus on chromosome 9p. *Hum Mol Genet* 17, 806-814.
31. Pilia, G., Chen, W.M., Scuteri, A., Orru, M., Albai, G., Dei, M., Lai, S., Usala, G., Lai, M., Loi, P., et al. (2006). Heritability of cardiovascular and personality traits in 6,148 Sardinians. *PLoS Genet* 2, e132.
32. John, U., Greiner, B., Hensel, E., Ludemann, J., Piek, M., Sauer, S., Adam, C., Born, G., Alte, D., Greiser, E., et al. (2001). Study of Health In Pomerania (SHIP): a health examination survey in an east German region: objectives and design. *Soz Präventivmed* 46, 186-194.

33. Hercberg, S., Galan, P., Preziosi, P., Roussel, A.M., Arnaud, J., Richard, M.J., Malvy, D., Paul-Dauphin, A., Briancon, S., and Favier, A. (1998). Background and rationale behind the SU.VI.MAX Study, a prevention trial using nutritional doses of a combination of antioxidant vitamins and minerals to reduce cardiovascular diseases and cancers. SUPplementation en VItamines et Mineraux AntioXydants Study. *Int J Vitam Nutr Res* 68, 3-20.
34. Huisman, M., Oldehinkel, A.J., de Winter, A., Minderaa, R.B., de Bildt, A., Huizink, A.C., Verhulst, F.C., and Ormel, J. (2008). Cohort profile: the Dutch 'TRacking Adolescents' Individual Lives' Survey'; TRAILS. *Int J Epidemiol* 37, 1227-1235.
35. de Winter, A.F., Oldehinkel, A.J., Veenstra, R., Brunnekreef, J.A., Verhulst, F.C., and Ormel, J. (2005). Evaluation of non-response bias in mental health determinants and outcomes in a large sample of pre-adolescents. *Eur J Epidemiol* 20, 173-181.
36. Lavanya, R., Jeganathan, V.S., Zheng, Y., Raju, P., Cheung, N., Tai, E.S., Wang, J.J., Lamoureux, E., Mitchell, P., Young, T.L., et al. (2009). Methodology of the Singapore Indian Chinese Cohort (SICC) eye study: quantifying ethnic variations in the epidemiology of eye diseases in Asians. *Ophthalmic Epidemiol* 16, 325-336.
37. Foong, A.W., Saw, S.M., Loo, J.L., Shen, S., Loon, S.C., Rosman, M., Aung, T., Tan, D.T., Tai, E.S., and Wong, T.Y. (2007). Rationale and methodology for a population-based study of eye diseases in Malay people: The Singapore Malay eye study (SiMES). *Ophthalmic Epidemiol* 14, 25-35.
38. Lim, L.S., Saw, S.M., Jeganathan, V.S., Tay, W.T., Aung, T., Tong, L., Mitchell, P., and Wong, T.Y. (2010). Distribution and determinants of ocular biometric parameters in an Asian population: the Singapore Malay eye study. *Invest Ophthalmol Vis Sci* 51, 103-109.
39. Nang, E.E., Khoo, C.M., Tai, E.S., Lim, S.C., Tavintharan, S., Wong, T.Y., Heng, D., and Lee, J. (2009). Is there a clear threshold for fasting plasma glucose that differentiates between those with and without neuropathy and chronic kidney disease?: the Singapore Prospective Study Program. *Am J Epidemiol* 169, 1454-1462.
